# Supplementary material for: ‘Just another vial…’: a qualitative study to explore the acceptability and feasibility of routine blood-borne virus testing in an emergency department setting in the UK
Source: PubMed Central journal article supplement — BMJ Open. 2019 May 1;9(4):e024085. doi: 10.1136/bmjopen-2018-024085 (PMC6501954; doi:10.1136/bmjopen-2018-024085), 2019-05-01
Supplement: bmjopen-2018-024085.draft_revisions.pdf [file bmjopen-2018-024085.draft_revisions.pdf]

# BMJ Open

BMJ Open is committed to open peer review. As part of this commitment we make the peer review history of every article we publish publicly available.

When an article is published we post the peer reviewers' comments and the authors' responses online. We also post the versions of the paper that were used during peer review. These are the versions that the peer review comments apply to.

The versions of the paper that follow are the versions that were submitted during the peer review process. They are not the versions of record or the final published versions. They should not be cited or distributed as the published version of this manuscript.

BMJ Open is an open access journal and the full, final, typeset and author-corrected version of record of the manuscript is available on our site with no access controls, subscription charges or pay-per-view fees (<http://bmjopen.bmj.com>).

If you have any questions on BMJ Open's open peer review process please email [info.bmjopen@bmj.com](mailto:info.bmjopen@bmj.com)

# BMJ Open

## 'JUST ANOTHER VIAL...': A QUALITATIVE STUDY TO EXPLORE THE ACCEPTABILITY AND FEASIBILITY OF ROUTINE BLOOD-BORNE VIRUS TESTING IN AN EMERGENCY DEPARTMENT SETTING

|                               |                                                                                                                                                                                                                                                                                                                                                                                                                                                                                                                                                                                                                                                                                                                                                                                                                                                                                                                                                                                                                                        |
|-------------------------------|----------------------------------------------------------------------------------------------------------------------------------------------------------------------------------------------------------------------------------------------------------------------------------------------------------------------------------------------------------------------------------------------------------------------------------------------------------------------------------------------------------------------------------------------------------------------------------------------------------------------------------------------------------------------------------------------------------------------------------------------------------------------------------------------------------------------------------------------------------------------------------------------------------------------------------------------------------------------------------------------------------------------------------------|
| Journal:                      | <i>BMJ Open</i>                                                                                                                                                                                                                                                                                                                                                                                                                                                                                                                                                                                                                                                                                                                                                                                                                                                                                                                                                                                                                        |
| Manuscript ID                 | bmjopen-2018-024085                                                                                                                                                                                                                                                                                                                                                                                                                                                                                                                                                                                                                                                                                                                                                                                                                                                                                                                                                                                                                    |
| Article Type:                 | Research                                                                                                                                                                                                                                                                                                                                                                                                                                                                                                                                                                                                                                                                                                                                                                                                                                                                                                                                                                                                                               |
| Date Submitted by the Author: | 10-May-2018                                                                                                                                                                                                                                                                                                                                                                                                                                                                                                                                                                                                                                                                                                                                                                                                                                                                                                                                                                                                                            |
| Complete List of Authors:     | Cullen, Lucy; London School of Hygiene and Tropical Medicine Faculty of Public Health and Policy, Department of Public Health, Environments and Society; National Institute for Health Research Health Protection Unit Grenfell, Pippa; London School of Hygiene and Tropical Medicine Faculty of Public Health and Policy, Department of Public Health, Environments and Society; National Institute for Health Research Health Protection Unit Rodger, Alison; University College London, Institute for Global Health; National Institute for Health Research Health Protection Unit Orkin, Chloe; Barts Health NHS Trust, HIV Medicine Mandal, Sema; Public Health England, Immunisation, Hepatitis, Blood Safety and Countermeasures Response; National Institute for Health Research Health Protection Unit Rhodes, Tim; London School of Hygiene and Tropical Medicine Faculty of Public Health and Policy, Department of Public Health, Environments and Society; National Institute for Health Research Health Protection Unit |
| Keywords:                     | HIV & AIDS < INFECTIOUS DISEASES, VIRAL HEPATITIS, ACCIDENT & EMERGENCY MEDICINE, TESTING, QUALITATIVE RESEARCH                                                                                                                                                                                                                                                                                                                                                                                                                                                                                                                                                                                                                                                                                                                                                                                                                                                                                                                        |
|                               |                                                                                                                                                                                                                                                                                                                                                                                                                                                                                                                                                                                                                                                                                                                                                                                                                                                                                                                                                                                                                                        |

SCHOLARONE™  
Manuscripts

1  
2  
3 1 *BMJ OPEN: submitted 08.05.2018*

4 2  
5 3  
6 4  
7 5  
8 6 **'JUST ANOTHER VIAL...': A QUALITATIVE STUDY TO EXPLORE THE ACCEPTABILITY AND FEASIBILITY OF**  
9 7 **ROUTINE BLOOD-BORNE VIRUS TESTING IN AN EMERGENCY DEPARTMENT SETTING**

10 8  
11 9  
12 10  
13 11  
14 12 **AUTHORS**

15 13 Lucy Cullen 1,5; Pippa Grenfell 1,5; Alison Rodger 2,5; Chloe Orkin 3; Sema Mandal 4,5; Tim Rhodes 1,5,6

16 14  
17 15  
18 16 **INSTITUTIONAL AFFILIATIONS**

- 19 17 1. Department of Public Health, Environments and Society, London School of Hygiene and Tropical Medicine,  
20 18 London, UK  
21 19 2. Institute for Global Health, University College London, London, UK  
22 20 3. HIV Medicine, Barts Health NHS Trust, London, UK  
23 21 4. Immunisation, Hepatitis, Blood Safety and Countermeasures Response, Public Health England, London, UK  
24 22 5. National Institute for Health Research Health Protection Research Unit (NIHR HPRU)  
25 23 6. National Centre for Social Research on Health, University of New South Wales, Sydney, Australia

26 24  
27 25  
28 26  
29 27 **CORRESPONDING AUTHOR**

30 28 Lucy Cullen, [lucy.cullen@lshtm.ac.uk](mailto:lucy.cullen@lshtm.ac.uk)  
31 29 15-17 Tavistock Place, Kings Cross, London WC1H 9SH

32 30  
33 31  
34 32 **EMAIL ADDRESSES**

35 33 Lucy Cullen: [lucy.cullen@lshtm.ac.uk](mailto:lucy.cullen@lshtm.ac.uk)  
36 34 Pippa Grenfell: [pippa.grenfell@lshtm.ac.uk](mailto:pippa.grenfell@lshtm.ac.uk)  
37 35 Dr Alison Rodger: [alison.rodger@ucl.ac.uk](mailto:alison.rodger@ucl.ac.uk)  
38 36 Professor Chloe Orkin: [Chloe.Orkin@bartshealth.nhs.uk](mailto:Chloe.Orkin@bartshealth.nhs.uk)  
39 37 Dr Sema Mandal: [sema.mandal@phe.gov.uk](mailto:sema.mandal@phe.gov.uk)  
40 38 Professor Tim Rhodes: [tim.rhodes@lshtm.ac.uk](mailto:tim.rhodes@lshtm.ac.uk)

41 39  
42 40  
43 41  
44 42 **ARTICLE RUNNING HEAD**

45 43 Routine blood-borne virus testing in the ED setting

46 44  
47 45  
48 46 Word Count: 6286

1  
2  
3 47 **ABSTRACT**  
4 48

5 49 **Objectives:** Increased test-uptake for HIV and viral hepatitis is fast becoming a health priority at both the  
6 50 national and global level. Late diagnosis of these infections remains a critical public health concern within the  
7 51 UK. Recommendations have been issued to expand blood-borne virus (BBV) testing in alternative settings.  
8  
9 52 Emergency Departments (ED) offer a potentially important point of testing. This paper presents findings from a  
10 53 qualitative study conducted to explore the acceptability and feasibility of a routine opt-out combined blood-  
11 54 borne virus testing intervention implemented at an inner London ED.  
12  
13 55

14  
15 56 **Methods:** We conducted 22 semi-structured interviews with ED patients (n=18) and ED service providers (n=4)  
16 57 over a four month period during the intervention pilot. A grounded analytical approach was employed to  
17 58 conduct thematic analysis of qualitative study data.  
18  
19 59

20  
21 60 **Results:** Core interrelating thematic areas identified and analytically developed in relation to test-intervention  
22 61 implementation and experience included (i) the remaking of routine test-procedure; (ii) notions of  
23 62 responsibility in relation to status knowledge and test-engagement; (iii) the opportunity and constraints of the  
24 63 emergency department as a site for testing; and (iv) the renegotiation of testing cultures within and beyond  
25 64 the space of the clinic.  
26  
27 65

28  
29 66 **Conclusion:** Interview narratives demonstrate how relational and spatial dynamics specific to the ED site shape  
30 67 constructions of test-meaning and engagement. We observe test-acceptability to be articulated through  
31 68 narratives of situated responsibility, with test-value offset by perceptions of need and the felt legitimacy of the  
32 69 test expense. We find that accounts speak to a productive potential of the test-disruption while at the same  
33 70 time revealing limits to the interventions' normalising effect. We point toward the need to attend to the local  
34 71 particularities of intervention implementation if the opportunities of the test-initiative are to be fully realised.  
35 72 We also highlight the need for further evaluation of post-test dimensions of intervention practice and  
36 73 experience.  
37  
38 74

39  
40 75 **KEYWORDS:** HIV; Viral Hepatitis; Emergency Department; Testing; Qualitative  
41  
42  
43  
44  
45  
46  
47  
48  
49  
50  
51  
52  
53  
54  
55  
56  
57

1  
2  
3 76 **Strengths and limitations of this study**  
4 77

- 5 78     ▪ Employing qualitative research methods we draw from twenty-two semi-structured interviews to  
6 79     examine the acceptability and feasibility of a novel three-combined blood-borne virus (HIV, HCV, HBV)  
7 80     routine test-intervention implemented in an emergency department (ED) setting in the UK.  
8 81  
9 82     ▪ An enriched understanding of ED patient and provider perspectives and experiences of the test  
10 83     intervention offers to inform and facilitate a more effective implementation of intervention practice  
11 84     beyond the pilot.  
12 85  
13 86     ▪ A key limitation to the study was speaking only with participants at point of clinic contact, and thus  
14 87     not being able to explore critical dimensions of the post-test experience, and more particularly the  
15 88     perceptions and experiences of those diagnosed through routine ED test-procedure.  
16 89  
17 90     ▪ We are aware that the small sample size does not include individuals who felt themselves to be at risk  
18 91     of returning a positive result, that could likely affect test-engagement and intervention experience.  
19 92  
20 93     ▪ We acknowledge that qualitative data as produced within and through the particularities of study  
21 94     context may limit the generalisability of study findings beyond the primary setting.  
22 95  
23 96  
24 97

1  
2  
3 98 **'JUST ANOTHER VIAL...': A QUALITATIVE STUDY TO EXPLORE THE ACCEPTABILITY AND FEASIBILITY**  
4 99 **OF ROUTINE BLOOD-BORNE VIRUS TESTING IN AN EMERGENCY DEPARTMENT SETTING**  
5  
6 100  
7 101

8  
9 102 **INTRODUCTION**  
10 103

11 104 Recent years have seen the continuing development of more effective and tolerable treatments for viral  
12 105 hepatitis and HIV. Yet the late diagnosis of these infections, associated with poorer individual health outcomes  
13 106 and increased population transmission, remains a prominent health concern at both the state,[1-4] and  
14 107 global,[5-8] level. Delayed access to HIV treatment increases the risk of severe health complications and  
15 108 premature mortality,[9-12] as well as onward transmission.[13-15] Global estimates indicate hepatitis B (HBV)  
16 109 and hepatitis C (HCV) infection to account for 47% and 48% respectively of the annual 1.4 million deaths from  
17 110 hepatitis-related liver cirrhosis and cancer.[6] Estimates further indicate HBV and HCV diagnosis to be critically  
18 111 low at 9% (HBV) and 20% (HCV).[7] Care cascade models demonstrate low testing rates a principal limitation to  
19 112 the 'success' of public health targets of treated viral hepatitis and HIV viral suppression. With blood-borne  
20 113 virus (BBV) testing and case-diagnosis sub-optimal, increased test-uptake remains a critical national and global  
21 114 priority for treatment benefits to be fully realised. [10,16,6]  
22 115

23 116 Within the UK, of the estimated 101,200 people living with HIV in 2015 as many as 13,500 were unaware of  
24 117 their status.[17] While the first UNADIS 90% target (ninety percent of people living with HIV being aware of  
25 118 their status) was reached in London in 2016, nationwide figures fell short at 88%.[2] Of that year, 42% of HIV  
26 119 diagnosis were made during later stages of infection.[4] Late diagnosis and low treatment rates for hepatitis B  
27 120 (HBV) and HCV are reflected in UK hospital admissions and mortality from HCV-related end-stage liver disease  
28 121 and HCV or HBV-related liver cancer.[3,18,19] Undiagnosed HCV cases among people who inject drugs, the  
29 122 major risk group for HCV infection in the UK, are estimated to be high.[20] The British HIV Association and  
30 123 National Institute for Health and Care Excellence Guidelines (2008 and 2013 respectively) have issued  
31 124 recommendations to increase uptake for BBV testing in alternative settings.[21-22] Ongoing efforts to reduce  
32 125 late HIV diagnosis (here, defined as a CD4 count of less than 350 mm),[23] alongside shifts in policy toward HIV  
33 126 prevention, have sought to expand HIV-testing initiatives both within and beyond the clinic environment.[24-  
34 127 29] This has included opt-out testing procedures where individuals are informed that a test will be conducted  
35 128 unless they indicate they do not want to be tested.  
36 129

37 130 Emergency Departments (hereafter referred to as ED) offer a potentially important point of testing [30]. It has  
38 131 been estimated that around one in four of the population in the UK and Republic of Ireland attend EDs in any  
39 132 one year.[31] For individuals not registered with GPs, including migrant populations disproportionately  
40 133 affected by HIV and chronic hepatitis B and C infection,[17,32] EDs can present as a primary point of health-  
41 134 service contact. Routine opt-out testing in the ED setting may also offer case-finding potential for individuals  
42  
43  
44  
45  
46  
47  
48

1  
2  
3 135 no longer identified as 'at risk' – such as former injecting drug users – who remain undiagnosed through GP or  
4 136 other health service contact until an advanced disease stage.[33-34]  
5  
6 137  
7 138 Much of the global literature on routine HIV testing in emergency departments has emerged from the US in  
8 139 response to the 2006 Centre for Disease Control and Prevention (CDC) guideline revisions.[35] International  
9 140 evaluation of service provider perspectives on routine HIV testing in ED settings has identified resource-cost  
11 141 and the efficacy of routine-test approaches a critical point of concern.[36-38] While conscious of the potential  
12 142 public health benefits, some view routine HIV testing to sit beyond the remit of emergency medical  
13 143 practice.[39-40] US-based examinations of patient perceptions and experiences have revealed levels of  
14 144 confusion around opt-out testing procedures.[41] Yet studies have also identified an acceptability to ED-based  
15 145 routine test-practices grounded in status curiosity and routes of reassurance, alongside the convenience of the  
16 146 test-opportunity while accessing clinic services.[42-43] Patient concerns about routine-testing procedures have  
17 147 centred on issues of confidentiality and the social implications of a positive result,[42] calling attention to how  
18 148 HIV test-practice and engagement remains both an individually and socially negotiated process.[44-45]  
19 149  
20 150 Aspirations that the introduction of routine BBV testing in more generalised clinic environments could help  
21 151 normalise HIV test practices and lessen illness-related stigma speaks to the enduring concern that negative  
22 152 attitudes around HIV continue to impede test uptake and diagnosis across high-income settings. Despite  
23 153 improved medical realities of hepatitis cure,[3] and near-normal life expectancy for those diagnosed early and  
24 154 able to access HIV treatment,[9] the social meaning of an illness condition and related test-practices are less  
25 155 easily reconfigured. Test engagement, while speaking to a health need, is a situated act embedded in socio-  
26 156 cultural systems of meaning that may also confer risk-association.[46] Continued misconceptions of hepatitis  
27 157 infection and transmission alongside the stigmatisation of associated risk-behaviours negatively impact  
28 158 hepatitis case identification and diagnosis across the UK.[33,34,46] While shifts in HIV testing norms have  
29 159 been detected among some communities within the UK, perceptions of the social risk attached to both test-  
30 160 engagement and a potential positive result continue to encroach on testing practices and frequency.[44-45]  
31 161 Debate concerning the value of non-targeted vs targeted test-approaches in the HIV field remains  
32 162 ongoing.[38,48,49] Some have argued targeted HIV-test approaches that centre on risk-assessment are  
33 163 necessary to ensure the protection of patient interest and ethics of practice in the context of the ED  
34 164 setting.[49] Others have in contrast voiced concerns that continued medical segregation and targeted test-  
35 165 practices perpetuate an HIV exceptionalism, illness stigma, and subsequent test anxiety.[38-39] How test-  
36 166 meaning is configured and negotiated through a routine practice in the ED setting, and the implication this  
37 167 extends to test-engagement and uptake, constitutes an important dimension to intervention potential.  
38 168  
39 169 Critical also to the evaluation of emergent test-technologies across the clinical, community – and more  
40 170 recently domestic – spheres, is the play of responsabilisation discourses in shaping health-seeking norms and  
41 171 practices. Concepts of biological citizenship that speak to an individualised responsibility to act in keeping with  
42 172 both a private and collective health,[50-52] can see test-technologies and practice function as enactments of

1  
2  
3 173 responsabilised health citizenship.[53,44] The dynamics of social, political and biomedical expectation as  
4 174 emergent test-technologies are encountered and negotiated in relation to normative test-practices and clinical  
5 175 procedure, warrants critical reflection. Attending to the 'behavioural domain' and psychosocial complexity of  
6 176 test-practice and engagement amidst broader 'normalisation' processes,[54-55] remains critical in evaluating  
7 177 the efficacy and value of an intervening test-technology.  
8  
9

10 178

11 179 UK-based qualitative research specific to opt-out BBV testing in the ED setting remains limited. To our  
12 180 knowledge there has been no patient-focused analysis of opt-out HIV testing in UK emergency departments to  
13 181 date, nor any qualitative inquiry of ED-based routine opt-out testing for HCV and HBV. This study thus sought  
14 182 to explore the acceptability and feasibility of a combined HIV, HCV and HBV routine opt-out testing initiative  
15 183 delivered to adult patients receiving routine bloods as part of their emergency care, from the perspectives of  
16 184 both emergency department patients and staff. The study looks at both the immediate responses to the  
17 185 intervention components and test event, but also at how these experiences are shaped by, and potentially  
18 186 renegotiate, broader social norms and forms of test practice and engagement.  
19  
20  
21  
22

23 187

24 188

## 25 189 **METHODS**

26 190

27 191 This paper draws on findings from a pilot qualitative study conducted to explore patient and provider  
28 192 responses to a combined BBV testing intervention implemented at an inner London ED.[56] Twenty-two semi-  
29 193 structured interviews were conducted with ED patients (n = 18) and service providers (n = 4) between May-  
30 194 August 2016.  
31  
32  
33  
34  
35

36 195

37 196 Under the BBV-test initiative, all ED patients over the age of 18 who have blood samples taken as part of their  
38 197 emergency care are routinely tested for HIV, HCV and HBV unless they specifically opt-out of the test. Health  
39 198 professionals taking the blood sample verbally explain to ED attendees that all patients are being routinely  
40 199 tested for the three viruses unless they indicate they do not want to be. Tests are offered to all adult patients  
41 200 having bloods taken, except those individuals who do not have the capacity to consent (for example on  
42 201 account of a psychotic illness or cognitive impairment) and those where the test offer cannot be verbally  
43 202 communicated and agreed to (for example across language barriers). Where tests are accepted, an extra vial  
44 203 of blood is drawn. Information relating to the testing intervention was made available through leaflets in the  
45 204 department (English language only), with posters displayed within ED waiting areas and assessment cubicles  
46 205 where bloods are taken. Test results operated on a 'no news is good news' policy. Those patients returning a  
47 206 positive serological result for any of the tested viruses were contacted within fourteen days and specialist  
48 207 consultation arranged.  
49  
50  
51  
52  
53  
54

55 208



1  
2  
3 209 We sought to recruit both ED patients and staff participants so as to explore the multiple dimensions of test  
4 210 expectation and experience that frame the medical encounter and intervention practice. Patient participants  
5 211 were sampled from individuals accessing ED services who had bloods taken as part of their emergency care  
6 212 and included individuals who were offered and accepted the BBV test (n = 10); individuals offered the test but  
7 213 who opted-out (n = 1); and also individuals who did not recall being offered the intervention, assumed not-  
8 214 tested (n = 7). Insofar as was possible we sought to include patients across a range of ages, gender and ethnic  
9 215 backgrounds to capture the diversity of the ED population. We spoke with nine male and nine female ED  
10 216 patients, between 23 and 82 years in age, of varying ethnicities (see Table 1 for information relating to patient  
11 217 participants). Patient and staff participants were recruited across different times of the day/evening, both  
12 218 during the week and at weekends to reflect variances of patient populations and department workloads.  
13 219 Health professionals were sampled from staff members directly involved in taking bloods and implementing  
14 220 the test-intervention. Staff participants included both male and female members of different staff grades,  
15 221 having worked at the department for between three and eight years.

16 222  
17 223 Interview discussions were semi-structured, shaped by a topic guide developed across members of the  
18 224 research team, while also guided by participant response. Interviews commenced following participants' giving  
19 225 written informed consent and, with their permission, were audio-recorded. While interpretation services had  
20 226 been identified for use if required, all interviews were conducted in English. Data was collected by LC who was  
21 227 not known to participants prior to the study, with all interviews conducted on the clinic site. Interviews lasted  
22 228 between 20 and 50 minutes, as determined by patient and staff availability. Interviews were immediately  
23 229 stopped in the event of the patient receiving further medical care. While interviews were resumed wherever  
24 230 possible, in cases where patient participants were transferred to other hospital departments or discharged,  
25 231 interviews could not always be concluded. Interview discussion areas sought to explore: views and (where  
26 232 applicable) direct experiences of the test intervention; previous test experiences and current test practices;  
27 233 knowledge and awareness of HIV, HCV and HBV viruses, transmission-risks and treatments; felt and perceived  
28 234 barriers and facilitators to BBV testing; and the felt appropriateness of the emergency department as a site for  
29 235 testing.

30 236  
31 237 All interview data were transcribed verbatim, with personal identifying details removed. In keeping with a  
32 238 grounded analytical approach to inform thematic development,[57-58] preliminary data coding and analysis  
33 239 commenced early in data collection, informing later interviews and allowing for emerging themes to be further  
34 240 explored across patient and staff accounts. Initial coding examined both a priori interests as well as inductive  
35 241 codes grounded in the study data. Secondary-level thematic coding was later conducted across the full dataset  
36 242 to further fracture the data and allow for the development of conceptually-driven categories. Points of tension  
37 243 and convergence in relation to emerging thematic areas were explored both between attendee accounts and  
38 244 across attendee and provider responses. Core thematic areas to emerge included: the renegotiating of routine  
39 245 procedure; felt and perceived testing responsibilities; the opportunity and limitations of the ED as a site for

1  
2  
3 246 testing; the interplay of testing cultures within and beyond the clinic. All names used in the analysis are  
4 247 pseudonyms.  
5  
6 248  
7 249 This study was undertaken as part of the National Institute for Health Research Health Protection Research  
8 250 Unit (NIHR HPRU) in Blood Borne and Sexually Transmitted Infections at University College London in  
9  
10 251 partnership with Public Health England and in collaboration with the London School of Hygiene and Tropical  
11 252 Medicine. The study was granted ethical approval from the West Midlands–South Birmingham Research Ethics  
12 253 Committee, and the London School of Hygiene and Tropical Medicine Ethics Committee.  
13  
14 254  
15 255 *Patient and Public Involvement:* Pre-study consultations were conducted with community organisation  
16 256 representatives working in the HIV, HCV and HBV fields to inform the design of the study. ED patients were not  
17 257 involved in the study design phase of the research. All study outputs and publications will be disseminated to  
18  
19  
20 258 those study participants who opted to give contact details for this purpose.  
21 259  
22  
23 260  
24  
25  
26  
27  
28  
29  
30  
31  
32  
33  
34  
35  
36  
37  
38  
39  
40  
41  
42  
43  
44  
45  
46  
47  
48  
49  
50  
51  
52  
53  
54  
55  
56  
57  
58  
59  
60

261 **Table 1: Patient participant information**

262

263

264 **Pseudonym Gender Age Region of origin BBV test-intervention response**

265

266 *Ryan* Male 18-29 US BBV test offer declined267 *Sofiya* Female 30-49 Eastern Europe BBV test offer not recalled, assumed not tested268 *Carlotta* Female 18-29 Western Europe BBV test offer accepted269 *Malcom* Male 30-49 UK BBV test offer not recalled, assumed not tested270 *Karen* Female (30-49\*) UK BBV test offer accepted271 *Ramisa* Female (30-49\*) Southern Asia BBV test offer accepted272 *Phil* Male 30-49 UK BBV test offer accepted273 *Ehsan* Male (50+\*) Middle East BBV test offer not recalled, assumed not tested274 *Sten* Male 30-49 Scandinavia BBV test offer not recalled, assumed not tested275 *Dennis* Male 50+ UK BBV test offer accepted276 *Hana* Female 18-29 Southeast Europe BBV test offer not recalled, assumed not tested277 *Julia* Female (18-29\*) Western Europe BBV test offer not recalled, assumed not tested278 *Matas* Male 30-49 Eastern Europe BBV test offer not recalled, assumed not tested279 *Dan* Male 30-49 UK BBV test offer accepted280 *Imogen* Female 50+ UK BBV test offer accepted281 *Ishani* Female 30-49 UK BBV test offer accepted282 *Lena* Female 18-29 Eastern Europe BBV test offer accepted283 *Khaled* Male (30-49\*) Middle East BBV test offer not recalled, assumed not tested

284

285

286

287

- 288 • A number of patient interviews were interrupted due to patient care pathways. In cases where interviews were not able to be resumed (for example where patients were transferred/discharged), patient information has insofar as is possible been extracted from interview data. Where patient ages were not available, an age-range estimate has been given based on biographical information given by patients during the interview.

292

**RESULTS**

Our study findings report on the perceptions and experiences of ED patients and service providers in response to the implementation of routine blood-borne virus test-intervention in a UK ED setting. While not all patient-participants were offered the intervention, in being eligible for intervention-practice they contributed valuable insight in to the acceptability, feasibility and limitations of the ED as a site for routine BBV testing. Intervention potential and practical negotiation is explored in four interrelating thematic areas: the remaking of routine test-procedure; notions of responsibility in relation to status knowledge and test-engagement; the opportunity and constraints of the hospital emergency department as a site for testing; and the renegotiation of testing cultures within and beyond the space of the clinic.

**A remaking of routine**

Processes of integrating an additional test in to standard ED practice were shaped by staff and patient interactions with, and responses to, the various intervention components. A number of patient participants described themselves as having been too preoccupied and distracted to register the intervention posters – a ‘background’ not properly taken in. Yet staff in contrast depicted the posters as an aid to intervention procedure; a visual reminder and point of reference in the assessment cubicle where blood samples are taken. Both patient and staff participants stressed the importance of how the verbal explanation was delivered; ‘the way you say it’, keeping it simple. Patient accounts make positive reference to the ‘straightforward’, ‘low-key’, ‘casual’ and non-intrusive communication that presented the test as just another part of routine procedure; no fuss.

*the guy yesterday when he took it, he was so laid back about the one sentence that he made, that you almost didn't want to say no. It wasn't a big deal, do you see what I mean? Like, there was no negativity attached to the way he was talking (Ishani)*

Adapting the test procedure to one in keeping with the demands of an ED workflow appears to support a more neutral and accessible practice where the *less* of the event helps bypass the potential ‘negativity’ of the test idea. Staff indicated the presence of friends and relatives during blood procedures to be common, but that the test-communication did not, for the most part, feel to sit apart from the ‘normal history-taking’ and established confidentiality of the room. While the intervention would at times be conducted in the presence of others, it was avoided in situations where those others were translating. The ‘no news is good news’ results system, while not infringing on patient decisions to test, was seen as less acceptable. The majority of patient participants indicated a preference to receive the test result, aware that ‘mistakes happen’. The ‘no news’ window could potentially be anxiety provoking, particularly if status was a point of concern – a ‘what if’ that would benefit from a more definite confirmation: ‘it would be nice to *know* so, you know’ (Phil).

For some ED staff the extra vial has, over time, become habit. Increasingly ‘more of a reflex action’ the test-

1  
2  
3 331 offer was less something remembered or forgotten but rather just done, affording staff the opportunity to see  
4 332 how the test-practice both could and does fit with existing procedures:

5 333

6  
7 334 *I think it's just, kind of like, there was an, "Oh, for goodness sake, yet another thing for us to do in our*  
8 335 *assessment cubicle," and then actually like, "Oh, no, this is, this is easy, this is not a problem."*

9 336 (clinic staff)

10 337

11  
12 338 Yet complex clinic situations can render intervention procedure more difficult to navigate. Ascertaining the  
13 339 extent to which the test had been effectively communicated across language barriers was a widely discussed  
14 340 concern. Staff also spoke of the difficulties of assessing capacity to consent of patients in more critical health  
15 341 conditions and particularly under the pressure of meeting immediate treatment demands.

16 342

17 343 *... it [conducting intervention] just depends on the sickness, I guess, how sick the patient is and how*  
18 344 *focused you are at trying to get all the treatment for the patient right in, done, and gauging are they*  
19 345 *actually understanding what you're saying at this point...* (clinic staff)

20 346

21 347 Accounts indicated efforts to integrate the test into routine practice would often require a judgement call –  
22 348 individual assessments on whether or not the intervention should be offered, and then how well it had been  
23 349 understood and consented to. Ambiguities of intervention procedure exposed through complex, pressurised  
24 350 clinic situations can give rise to divergences of test practice where the appropriateness of the test offer and  
25 351 delivery, and critically processes of patient consent, can become less apparent and potentially less acceptable  
26 352 to both staff and patients. Intervention implementation also meets ongoing resistance in the ED 'working  
27 353 environment', with high patient volume, intense workloads and rapid staff turnover impeding attempts to  
28 354 'remember' the still 'extra' blood vial. The volume of patients that presents both the opportunity and  
29 355 advantage of testing in the ED setting is the same 'mass volume' that makes an altered routine more difficult  
30 356 to establish. In the context of a department 'struggling to do the basic things' while attending large numbers of  
31 357 acutely ill patients, the extra vial is still felt to be an 'extra element' (clinic staff).

32 358

33 359

#### 34 360 **A responsibility to know**

35 361 A prominent feature of participant accounts was the view that 'it's better to know'. Described as a 'good' and  
36 362 'important' thing to do, patient accounts indicate a generalised expectation not only to test, but to want to  
37 363 test – a route to 'feel[ing] healthier' and 'clean'.

38 364

39 365 *If these things are curable, then fine, they've heard something that they need to know. If they're not,*  
40 366 *then it gives them time to get themselves in order. I think it's always better to know than not know. Do*  
41 367 *I believe that? Yes, I do, yeah.* (Imogen)

42 368

1  
2  
3 369 Expectations to test are further reinforced through the known availability of treatment. For Ehsan the  
4 370 'treatability' of HIV renders the phobia of testing for the virus less legitimate, a fear that should not still be  
5 371 there. Matas' deferral of the primary option of interferon treatment when diagnosed with hepatitis C four  
6 372 years previously, waiting to see if 'science comes up with anything better', contends the assumed linearity  
7 373 premised in a 'test and treat' ethic. Yet managing the knowledge of a health condition was implied by Matas  
8 374 and others as something that just has to be done; 'a bit unexpected but you know what can you do? It is like it  
9 375 is' (Matas); '... it's not going to be easy to take, you know, but that's, that's life' (Malcom).

10 376  
11 377 Patient accounts also voice a public responsibility to know. This was positioned in relation to population health  
12 378 – to ensure against onward transmission – but also direct to the state. For Imogen, expectations of state  
13 379 support are reciprocated in expectations of individual health monitoring and management:

14 380  
15 381 *we're adults, we're responsible for our actions [...] we need to check these things [...] that's, kind of,*  
16 382 *part of my psyche, you look after yourself and you do not expect the health service to look after you.*  
17 383 *Well, you do, but you have to have played your part.... (Imogen)*

18 384  
19 385 Engaging with the 'free opportunity' of the test is implied to constitute an act of health-citizenship; a  
20 386 demonstration of meeting expectations, being responsible, playing one's part. For the majority of participants  
21 387 the right of the patient to choose was critical. Yet a small number felt the test should be 'obligatory'. Insofar as  
22 388 infection poses a risk beyond the individual, the 'safeguard' of the test should be engaged with 'for the good of  
23 389 society' (Ehsan). For Ehsan the right to choose is a privilege of 'out there' that changes when you enter the  
24 390 'here' of the ED clinic space. The act of service access denotes a responsibility to the clinic network – the  
25 391 people, place and resources that you have sought help from – that forgoes the right to decline.

26 392  
27 393 All patient participants, irrespective of whether the test had been offered, indicated confidence in a negative  
28 394 result. Those who accepted the test engaged with the practice either as a form of opportunistic assurance – a  
29 395 'might as well' – or indifference – 'I'm not concerned about any of those things'. Tests actively sought in the  
30 396 past were linked either to changes in relationship status or increased sense of risk. While participants indicated  
31 397 they would initiate a test if they felt cause to do so, few said it would be something they would consider  
32 398 otherwise. Without an explicit need test-engagement remains predominantly passive; 'it's on my to do list' –  
33 399 thought about, but not a priority. In the absence of status anxiety acceding to new routine procedures is easily  
34 400 done. How the test offer and practice would be received by those who feel more at risk is less apparent. A  
35 401 potential reluctance to test was speculated in 'others' who might be more anxious about a positive result: 'the  
36 402 thought of having something wrong with you, some people would rather not know' (Karen). Felt  
37 403 responsibilities to know sit relative to an anticipated reality of knowing, and the irreversible knowledge-  
38 404 process enacted through the test event; 'once you know that's it, you know, you've got it' (Dan).

39 405  
40 406

1  
2  
3 407 **A Time and place**

4 408 The appropriateness of the ED as a site for testing was questioned by a small number of patient participants.  
5  
6 409 Ryan, though supportive of the offer, did not feel he had the mental capacity for it that day: 'I don't really want  
7 410 to pile on the bad news [...] I don't want a double-whammy – that would be an unpleasant day' (Ryan). For  
8 411 Khaled the test conflicts with the principal tenet of the 'emergency' remit:

9 412  
10 413 *emergency services is always full with emergencies so they have to deal with priorities [...] But that*  
11 414 *one is not that kind of priority because if you have it you have it, you cannot cure it by emergency*  
12 415 *services, you have to take a long term treatment (Khaled)*  
13 416

14 417 Unless directly 'applicable' to a patient's differential diagnosis the test should be conducted at some other  
15 418 time and some other place; 'emergency is for emergency' (Khaled). In tension with the overriding acceptability  
16 419 of the intervention was the less articulated counter narrative of *this isn't the time*.

17 420  
18 421 Yet the more dominant narrative was one of presented opportunity. Participants who accepted the  
19 422 intervention commonly constructed the test offer as a well-situated add-on; 'they're taking bloods anyway'.  
20 423 The ease and convenience of an extra vial was thought to encourage people to test who otherwise would not  
21 424 have sought to do so.

22 425  
23 426 *a person won't just go out there to have a HIV test, like on an ordinary day, they wouldn't even think*  
24 427 *about it [...] just imagine you spend your day and would I just go, "I'm going to go and have a HIV test*  
25 428 *today," they wouldn't ... because you think, 'Oh, I haven't got it, you know, I don't need to,' you*  
26 429 *wouldn't do it in a million years. (Ramisa)*  
27 430

28 431 Despite taking time to integrate into pre-established blood-routines, staff indicated the drawing of another vial  
29 432 from someone already having bloods taken was both minimal, but also practical: '... we are already putting a  
30 433 needle into somebody's vein, we are already taking blood' (clinic staff). The ED site offers a point of contact  
31 434 with individuals who, in the absence of felt risk, are neither testing nor thinking about testing. Opportunities of  
32 435 re-contact also present with individuals who have – as in the case of Matas – disengaged from care services.  
33 436 Unregistered with a GP Matas has had minimal service contact beyond intermittent visits to emergency care,  
34 437 remaining unaware of recent advances in HCV treatment options.

35 438  
36 439 The emergency care setting also offers an alternative point of contact for HIV testing with individuals less able,  
37 440 or willing, to access sexual health services. For some participants the anonymity of a sexual health clinic  
38 441 afforded a heightened sense of privacy – 'there are no questions, no nothing' (Sten). Yet for others, the  
39 442 visibility of the sexual health clinic presented complications, with service access potentially compromised in  
40 443 light of what being seen in the clinic might imply:

41 444

1  
2  
3 445 *I will take an example of Muslim people like me. You will see loads of girls wearing scarf but doing*  
4 446 *things that you're not supposed to do, then in the end case she thinks she has something, how she will*  
5 447 *go to sexual health clinic? Just example of people who are like me (Hana)*  
6  
7 448

8 449 For Ehsan the sexual health clinic constitutes a space of heightened anxiety and concern; a difficult space to  
9 450 enter that concedes both to the self and others not only that there is a problem, but that it is *this* type of  
10 451 problem.  
11  
12 452

13  
14 453 *if you enter that building I think it's this... Not phobia, it's [...] it's that there is something seriously*  
15 454 *wrong with you [...] it takes you to totally different atmosphere and you can feel it when you see*  
16 455 *people sitting down [...] there is a stigma attached to that building ... (Ehsan)*  
17  
18 456

19  
20 457 In contrast to the known specificity of the clinic, Ehsan positions the ED setting as a place where you do not  
21 458 feel that difference, there are 'too many different types of illnesses'. The ED supports a protective anonymity  
22 459 and neutrality of space; accessed by all, where everyone has something going on but no one knows what  
23 460 exactly.  
24  
25 461

### 26 462

### 27 463 **Cultivating a 'culture of testing'**

28 464 Processes of test-implementation are simultaneously enabling and demanding a renegotiated 'culture of  
29 465 testing' within the clinic setting. Intervention efforts point toward a standardising of both staff practice and  
30 466 patient expectation that would see 'testing everyone' – and thus getting tested – made the norm. The test-all  
31 467 precedent was seen to alleviate the sense of an implied, or felt, target:  
32  
33 468

34 469 *... and the fact that it's on the wall and it's saying that it's a, you know, 'we're asking everybody if you*  
35 470 *want to be tested' then it's kind of 'oh OK, you know, you probably asked the guy that was in before,*  
36 471 *I'm no different'... (Phil)*  
37  
38 472

39 473 Helping dispel initial anxieties of *why are you testing me?*, the routinizing of the test practice was seen to  
40 474 improve the test experience. The test 'standard', both easier to deliver and more readily received, sits in  
41 475 contrast to a differential test that 'puts the fear of god into that one person, that we're testing you for it...'  
42 476 (clinic staff). Staff observations of the intervention in practice suggest that the standardised test-approach not  
43 477 only opens up greater diagnostic opportunity, but also helps diffuse still existing preconceptions of those  
44 478 'affected', both within and beyond the clinic environment.  
45  
46 479

47 480 *I think we're missing out on a massive group of people by, by targeting it and I think here we're kind of*  
48 481 *getting people from every spectrum, every walk of life and [...] there are people who are having*  
49 482 *positive results that you kind of don't, [...] it's not someone that, and this is going to sound awful but*  
50  
51  
52



1  
2  
3 483 *it's not someone that you expect to have had a positive test. I think there's still, even for us [clinic*  
4 484 *staff] there's still kind of like a little bit of stigma around it and you attach it to certain groups of*  
5 485 *people. (clinic staff)*  
6  
7 486

8 487 As reiterated across ED patient accounts, while public misconceptions relating to HIV were described as  
9 488 'changing', they were still felt to be both present and problematic.

10 489  
11  
12 490 Yet perceptions of test value and expectation are shaped also by the felt legitimacy of the claim on clinic time  
13 491 and resources. The efficacy of the intervention – how efficient and who's going to pay – was a question often  
14 492 posited by patient participants: '...if the benefits of doing it cannot be justified by the resource cost that would  
15 493 be needed to do it then clearly it can't be done [...] It's a no-brainer' (Malcom). Patient anxieties of 'wasting  
16 494 time' betray a reluctance to access primary care until a specific health-need can be clearly evidenced. Efforts  
17 495 to reconfigure testing norms and expectation can thus sit in tension with perceptions of systemic constraints  
18 496 that do not encourage or support people to 'just check':  
19  
20  
21  
22

23 497  
24 498 *... It has to be like a society, society's mentality to just check, you know take care of your body and, you*  
25 499 *know, make sure everything is okay and not only when you're, you know, dying, or something is*  
26 500 *seriously wrong because many times it's too late when that happens, you know. (Lena)*  
27  
28 501

29  
30 502 Current testing cultures orientate around *having reason*; legitimised through an identifiable symptom or risk.  
31 503 Efforts to routinise the test-practice remain situated within, and shaped by, broader norms of service deferral;  
32 504 an *ethic of waiting* until need is established, where public responsibilities to monitor one's health sit relative to  
33 505 the cost of doing so.  
34  
35  
36

37 506  
38 507 Renegotiating testing cultures meets further resistance in the limited knowledge and talk of the tested viruses.  
39 508 While not infringing on decisions to test in the context of this study, illness stigma and related anxieties were  
40 509 commonly offered as a reason why 'others' may prove reluctant. Interview discussions orientated heavily  
41 510 around HIV, with hepatitis B and C both less understood and less spoken about. While degrees of HIV talk  
42 511 differed in relation to cultural norms and across generations, there was consensus that conversations would  
43 512 only ever go so far. Critical boundaries were identified between talk *about* HIV and *having* HIV: '...people talk  
44 513 about it [HIV] just as a, distant thing...' (Lena). The condition was predominantly depicted as an abstraction,  
45 514 remotely experienced through forms of news and media coverage. Rarely discussed in the private sphere,  
46 515 knowledge limits were accounted for in not *needing* to know.  
47  
48  
49

50 516

51 517 *... to be honest, the truth is I feel like it's something that doesn't affect or concern me. I know that*  
52 518 *sounds ignorant and stupid, but I'm just being honest with you ...And I think that's how a lot of people*  
53 519 *feel (Ishani)*  
54  
55

56 520  
57  
58  
59  
60

1  
2  
3 521 Both staff and patient responses call attention to the need for concurrent change in public norms, perception  
4 522 and talk beyond the intervention if the routinizing of the test practice is to be understood and accepted, and a  
5 523 broader culture of testing supported.  
6  
7 524  
8  
9 525  
10 526  
11 527

## 12 528 **DISCUSSION**

14 529 Findings from this qualitative study indicate routine opt-out BBV testing in the ED setting to be viewed as an  
15 530 acceptable and valuable practice by the majority of patient and staff participants. Consistent with qualitative  
16 531 findings exploring HIV-testing acceptance in emergency departments in the US, test-receptivity of study  
17 532 participants pivots around the narrative thread of it's better to know;<sup>[43]</sup> a 'better' widely underscored by  
18 533 participants' reference to the perceived availability and efficacy of HIV treatment. Knowledge of the hepatitis  
19 534 virus and respective treatments was notably limited. Problems of test-implementation were primarily linked to  
20 535 broader systemic constraints,<sup>[38]</sup> where unrelenting pressures of the ED working environment were felt to  
21 536 impede the process of integrating the test into routine practice. Service providers spoke of the difficulties of  
22 537 navigating the *change* of the intervention, rather than reservations around the intervention itself. Yet clinic  
23 538 staff also anticipated that once embedded into department procedure, and in time patient expectation, the  
24 539 feasibility of the intervention would align more closely with the observed acceptability of the test practice.  
25  
26  
27  
28  
29

30 540  
31 541 **Narratives of Responsibility:** Findings suggest intervention acceptability to be shaped in part by negotiations  
32 542 of competing responsibilities. Prevalent across participant responses was the dominant narrative of a  
33 543 *responsibility to know*. Responsibilities of knowing were articulated in relation to both a private well-being of  
34 544 self, but also a public responsibility – to know your status, more specifically a positive status, to ensure against  
35 545 onward transmission. Resonating with broader neoliberal discourses of citizen expectation and biological  
36 546 responsibility, participant accounts would often position test-uptake as an enactment of health citizenship – a  
37 547 perceived patient-citizen role.<sup>[50-51]</sup> Yet scripts of responsibility were at the same time countered by an  
38 548 absence of need and the positioning of the self as one not 'affected'. Test-histories of patient participants  
39 549 demonstrate, for the most part, norms of passive test-engagement made active in response to an altered  
40 550 sense of risk. Transitions from an assumed-negative to a potential-positive – where felt expectations to know  
41 551 converge with an overt need – witness a more proactive, albeit temporary, test-engagement called to effect.  
42 552 Underscoring participant narratives is the dual expectation of *having need* that would ensure the legitimacy of  
43 553 the test-claim on clinic time and resources. Patients' heightened awareness of service-rationing sees a  
44 554 questioned appropriateness pull against the dominant script of intervention-acceptability. Responsibilities of  
45 555 knowing thus sit in tension with perceived personal and state responsibilities to ensure that increasingly  
46 556 limited clinic resources are efficiently deployed. This likewise speaks to a situated ethics of a test-for-all  
47 557 approach,<sup>[39]</sup> with the value of the test positioned relative to the cost of its delivery and anticipated rate of  
48 558 return. In the absence of explicit risk and subsequent need the test-expense is less clearly supportable.  
49  
50  
51  
52  
53  
54  
55  
56  
57

559

560 **A Productive Disruption:** The extent to which the test-practice can be made routine and move beyond the  
561 initial disruption of its implementation – the point at which the extra vial ceases to be an 'extra' – though  
562 envisioned, remains uncertain. While staff spoke of the test-practice becoming more instinctive over time, the  
563 'struggle' to make the intervention a routine procedure remains evident. Amidst the pressures of ED  
564 workflows the intervention still posits a point of disruption. Yet efforts to standardise the test-practice at the  
565 same time allow for a more productive disturbance. Firstly, the situated implementation of the intervention  
566 engenders a neutralising potential as test-practice and meaning are reconstituted within and through the  
567 particularities of the emergency clinic environment.[59] The 'struggle' to integrate the test into department  
568 procedure amidst uncompromising clinic demands not only enables but necessitates and makes visible the  
569 'standardisation' of test-practice; the test is rendered less of an event because it has to be. Given the high  
570 patient traffic, close proximity and discernible numbers of others tested, the routine of the procedure is  
571 likewise more immediately evident. Second, the tentative displacement of the test-target in a generalised  
572 clinic environment potentiates a disruption to 'at-risk' identities felt to be conferred through test-practice and  
573 engagement. The routine of the test points to a test-need, expectation and responsibility that extends beyond  
574 existing risk parameters. This suggests a potential of the spatial dynamics of the ED setting to challenge socially  
575 embedded risk-associations. Obscuring 'affected' binaries stands to lessen the social risk of being seen to be  
576 tested. The routine of the procedure thus affords a form of public protection that likewise lends the test-  
577 intervention a social value beyond the quantifiable efficacy of intervention uptake and case-return.

578

579 **Situated Intervention Potential:** Yet study findings also call attention to the limits to the test-intervention's  
580 'normalising' effect. The extent to which risk-associations of testing technologies *can* be reconfigured through  
581 generalised test-setting and procedure remains questionable. As demonstrated in the study findings, while the  
582 non-target approach was positively received among study participants, test-uptake remained framed by  
583 narratives of test-ambivalence. 'At risk' distinctions, though momentarily disrupted, were then refashioned  
584 through retrospective accounts of test-engagement (or would-be engagement) grounded in a continued  
585 positioning of the self as one not affected. Such narrative devices, though peripheral, call attention to ongoing  
586 social constraints impeding efforts to renegotiate tacit risk-identities inferred through acts of test-  
587 engagement. The expectation that a standardisation of clinic practice could translate into a 'normalisation' of  
588 test-experience is a formidable aspiration, but one that faces resistance and local negotiation. As we have  
589 observed, prior knowledge and experience of the viruses to be tested; the dynamics of the clinic space and  
590 therapeutic pathways; perceived health responsibilities; socially embedded test-associations; and the  
591 anticipated reading of test-engagement by others at once shape and are shaped by the routinising of the test  
592 procedure. Our findings thus indicate embryonic intervention effect to be constituted through and contingent  
593 on the processes of the interventions' local implementation, with test-meaning and value recursively produced  
594 as altered norms of practice are variously encountered and negotiated within and beyond the test event.[59-  
595 60]

596

1  
2  
3 597 **Policy Implications and Study Limitations:** Our qualitative analysis offers a critical sociological contribution to  
4 598 intervention evaluation that will enrich statistical appraisal of BBV test-uptake, diagnosis rates and cost-  
5 599 effectiveness.[54] An improved understanding of participant perspectives and intervention experience as  
6 600 supported through the study analysis will likely contribute to the success and efficacy of intervention scale-up  
7 601 beyond the pilot. Study findings highlight the need to attend to the local particularities of intervention  
8 602 implementation if the benefits of the test-initiative are to be fully realised. Considerations of expanded  
9 603 practice in the UK must take seriously the intensity of ED workflows and the implications of increasing  
10 604 demands on already over-stretched emergency care resources. Intervention-reach and test-uptake among  
11 605 migrant populations – as pertinent to those disproportionately affected by HIV and viral hepatitis in the  
12 606 UK,[2,3,32,46] – will likely remain restricted while language barriers continue to preclude test-offer and  
13 607 delivery among this patient sub-group. Yet findings at the same time call attention to a demonstrated  
14 608 potential of intervention practice to extend an alternative route of contact with individuals at risk of falling  
15 609 through the gaps,[33] or positioned beyond targeted test strategies. Significant also is the extent to which  
16 610 hepatitis B and C were not only less discussed but, for the most part, much less understood. Limited public  
17 611 knowledge of these conditions calls to question the ethical implications of introducing an opt-out test  
18 612 procedure among individuals who have little if any understanding of what a positive result might mean.  
19 613  
20 614 Interpretation of our qualitative findings must also attend to a number of study limitations. First, study  
21 615 findings draw from a small, site-specific population. Second, our sample does not include patients who felt  
22 616 themselves to be potentially at risk of a positive result. As identified through explorative research of  
23 617 alternative HIV test-interventions,[44] test practices and the acceptability of intervention procedure will  
24 618 invariably take on different meanings for those negotiating a potential positive, and demands further enquiry.  
25 619 Likewise in speaking with individuals at the point of clinic contact the study was not able to explore the views  
26 620 and experiences of those diagnosed through ED test procedure, and thus the onward dimensions of the test  
27 621 intervention that are integral to the intervention process. Exploration of post-test experience and the  
28 622 implications this extend to test-acceptability and engagement is needed for a more comprehensive  
29 623 understanding and evaluation of intervention experience and value.  
30 624  
31  
32  
33  
34  
35  
36  
37  
38  
39  
40  
41  
42  
43  
44  
45  
46  
47  
48  
49  
50  
51  
52  
53  
54  
55  
56  
57  
58  
59  
60

1  
2  
3 625 **Declarations**

4 626

5 627 *Acknowledgements:* The authors would like to thank all those who participated in the study for their time and  
6 628 the valuable information shared with us. We are also grateful to the ED clinic lead and staff members for their  
7 629 assistance and support during study fieldwork and recruitment. We thank the community organisation  
8 630 representatives of the Hepatitis C Trust and British Liver Trust with whom we consulted during the study  
9 631 design. We also wish to acknowledge and thank study funders for their financial support, and *NIHR HPRU*  
10 632 *Steering Committee:* Caroline Sabin (Director), Anthony Nardone (PHE Lead), Catherine Mercer, Gwenda  
11 633 Hughes, Jackie Cassell, Greta Rait, Samreen Ijaz, Tim Rhodes, Kholoud Porter, Sema Mandal and William  
12 634 Rosenberg.

13 635

14 636 *Author's contributions:* Conceptualisation and critical direction for the study was provided by TR, SM, PG, AR  
15 637 and LC. Data generation was completed by LC. Primary data analysis was carried out by LC, with input from PG.  
16 638 The original manuscript was prepared by LC. All authors reviewed and provided critical input to manuscript  
17 639 drafts, and provided final approval.

18 640

19 641 *Funding:* The study was undertaken with funding from the National Institute for Health Research Health  
20 642 Protection Research Unit (NIHR HPRU) in Blood Borne and Sexually Transmitted Infections at UCL in  
21 643 partnership with Public Health England and in collaboration with London School of Hygiene and Tropical  
22 644 Medicine. The views expressed in this publication are those of the author(s) and not necessarily those of the  
23 645 National Institute for Health Research or Public Health England.

24 646

25 647 *Conflict of interest:* CO has received research grants, lecture fees, travel grants and honoraria toward advisory  
26 648 boards from MSD, Gilead, Viiv and Janssen. Toward this work, CO received funding for the testing project by a  
27 649 Gilead Fellowship grant. AR receives non-restricted grant funding from Gilead. LC, PG, SM and TR declare no  
28 650 conflicts of interest in relation to this work and its submission. The paper has not been previously published  
29 651 and neither is it being considered for publication elsewhere.

30 652

31 653 *Ethics Approval and consent to participate:* The study was granted ethical approval from the West Midlands–  
32 654 South Birmingham Research Ethics Committee (ref 16/WM/0033), and the London School of Hygiene and  
33 655 Tropical Medicine Observational Research Ethics Committee (ref 10469). All study participants provided  
34 656 informed written consent prior to the start of the study interview.

35 657

36 658 *Availability of data and materials:* No additional data are available.

37 659

38 660

39 661

1  
2  
3 662 **REFERENCES**

- 4 663  
5 664  
6 665  
7 666  
8 667  
9 668  
10 669  
11 670  
12 671  
13 672  
14 673  
15 674  
16 675  
17 676  
18 677  
19 678  
20 679  
21 680  
22 681  
23 682  
24 683  
25 684  
26 685  
27 686  
28 687  
29 688  
30 689  
31 690  
32 691  
33 692  
34 693  
35 694  
36 695  
37 696  
38 697  
39 698  
40 699  
41 700  
42 701  
43 702  
44 703  
45 704  
46 705  
47 706  
48 707  
49 708  
50 709  
51 710  
52 711  
53 712  
54 713  
55 714  
56 715  
57 716  
58 717  
59 718  
60 719  
710  
711  
712  
713  
714  
715  
716  
717  
718  
719  
720  
721  
722  
723  
724  
725  
726  
727  
728  
729  
730  
731
- 1) Nardone A, Delpech V, Gill O, et al. HIV in the UK: test, test, and test again. *Lancet*. 2013;382(9906):1687–1688
  - 2) Brown AE, Kirwan PD, Chau C, et al. *Towards elimination of HIV transmission, AIDS and HIV-related deaths in the UK – 2017 report*. London, Public Health England, 2017.
  - 3) Harris H (editor). *Hepatitis C in the UK – 2017 Report*. London, Public Health England, 2017.
  - 4) Nash SG, Furegato M, Gill ON, et al. *HIV testing in England: 2017 report*. London, Public Health England, 2017
  - 5) *Political Declaration on HIV and AIDS: On the Fast Track to Accelerating the Fight against HIV and to Ending the AIDS Epidemic by 2030*. A/RES/70/266. United Nations General Assembly, June 2016
  - 6) World Health Organisation, *Global Health Sector Strategy on Viral Hepatitis 2016-2021: Towards ending viral hepatitis*. Geneva, 2016
  - 7) World Health Organisation, *Global Hepatitis Report 2017*. Geneva, WHO, 2017.
  - 8) World Health Organisation (2017), *Statement on HIV testing services*.
  - 9) May M, Gompels M, Delpech V, et al. Impact on life expectancy of HIV-1 positive individuals of CD4+ cell count and viral load response to antiretroviral therapy. *AIDS*. 2014;28:1193-1202
  - 10) Rodger A, Sabin C (2016). How have guidelines on when to start antiretroviral therapy affected survival of people living with HIV infection. *Curr Opin in HIV and Aids*.2016;11(5):487-491.
  - 11) INSIGHT START. Initiation of Antiretroviral Therapy in Early Asymptomatic HIV Infection. *N Eng J Med*. 2015;373(9):795-807
  - 12) TEMPRANO ANRS 12136 Study Group. A trial of early antiretrovirals and isoniazid preventive therapy in Africa. *N Eng J Med*. 2015;373:808-822.
  - 13) Cohen MS, McCauley M, Gamble T. HIV treatment as prevention and HPTN 052. *Curr Opin in HIV and Aids*, 2012;7(2):99-105.
  - 14) Miller WC, Powers KA, Smith MK, et al. Community viral load as a measure for assessment of HIV treatment as prevention. *Lancet Infect Dis*.2013;13:459-64.
  - 15) Rodger A, Cambiano V, BruunT, et al for the PARTNER Study Group. Sexual Activity Without Condoms and Risk of HIV Transmission in Serodifferent Couples When the HIV-Positive Partner Is Using Suppressive Antiretroviral Therapy. *JAMA*. 2016;316(2):171-81. doi: 10.1001/jama.2016.5148.
  - 16) World Health Organisation. *Consolidated guidelines on HIV Testing Services: 5Cs – consent, confidentiality, counselling, correct results and connection*. France; WHO, 2015.
  - 17) Kiran PD, Chau C, Brown AE et al. *HIV in the UK – 2016 Report*. London Public Health England, 2016.
  - 18) Costella, A., Balogaun, K., Andrews, N., Mandal, S., Harris, H. *Hepatocellular Carcinoma Deaths in England with Chronic Hepatitis B and Hepatitis C Infection*. Poster presented at Faculty of Public Health Annual Conference and Public Health Exhibition; 14-15 June 2016, Brighton Centre, Brighton.
  - 19) Public Health England. *2<sup>nd</sup> Atlas of variation in risk factors and Healthcare for Liver Disease in England – Hepatitis B*. London, Public Health England, 2017.
  - 20) Public Health England. *Shooting Up: Infections among people who inject drugs in the UK, 2015*. London: Public Health England, 2016.
  - 21) British HIV Association (BHIVA), British HIV Association for Sexual Health and HIV, British Infection Society. *UK Guidelines for HIV testing 2008*. London, 2008.
  - 22) National Institute for Health and Clinical Excellence (NICE). *Hepatitis B and C: ways to promote and offer testing to people at increased risk of infection*. Public health guidance. PH43.
  - 23) Croxford S, Kitching A, Desai S et al. Mortality and causes of death in people diagnosed with HIV in the era of highly active antiretroviral therapy compared with the general population: an analysis of a national observational cohort. *Lancet Public Health*. 2016;2(1);e-35-e46.
  - 24) Rayment M, Thornton A, Mandalia S, et al. HIV testing in non-traditional settings—the HINTS study: a multi-centre observational study of feasibility and acceptability. *PLoS One*. 2012;7(6):e39530.

1  
2  
3  
4  
5  
6  
7  
8  
9  
10  
11  
12  
13  
14  
15  
16  
17  
18  
19  
20  
21  
22  
23  
24  
25  
26  
27  
28  
29  
30  
31  
32  
33  
34  
35  
36  
37  
38  
39  
40  
41  
42  
43  
44  
45  
46  
47  
48  
49  
50  
51  
52  
53  
54  
55  
56  
57  
58  
59  
60732  
733  
734  
735  
736  
737  
738  
739  
740  
741  
742  
743  
744  
745  
746  
747  
748  
749  
750  
751  
752  
753  
754  
755  
756  
757  
758  
759  
760  
761  
762  
763  
764  
765  
766  
767  
768  
769  
770  
771  
772  
773  
774  
775  
776  
777  
778  
779  
780  
781  
782  
783  
784  
785  
786  
787  
788  
789  
790  
791  
792  
793  
794  
795  
796  
797  
798  
799  
800

- 25) Burns F, Edwards SG, Woods J, *et al.* Acceptability and feasibility of universal offer of rapid point of care testing for HIV in an acute admissions unit: results of the RAPID project. *PLoS One* 2012; 7(4):e35212.
- 26) Phillips D, Barbour A, Stevenson J, *et al.* Implementation of a routine HIV testing policy in an acute medical setting in a UK general hospital: a cross-sectional study. *Sex Transm Infect.* 2014;90(3):185-7
- 27) Leber W, McMullen H, Anderson J *et al.* Promotion of rapid testing for HIV in primary care (RHIVA2): a cluster-randomised controlled trial. *Lancet HIV*, 2015;2:e229–235
- 28) Glew S, Pollard A, Hughes L, *et al.* Public attitudes towards opt-out testing for HIV in primary care: a qualitative study. *Br J Gen Pract.* 2014;64(619):E60-66
- 29) Witzel TC, Rodger AJ, Burns FM, *et al.* HIV Self-Testing among Men Who Have Sex with Men (MSM) in the UK: A Qualitative Study of Barriers and Facilitators, Intervention Preferences and Perceived Impacts. *PLoS ONE* 2016;11(9); doi.org/10.1371/journal.pone.0162713
- 30) Bath R, Ahmad K, Orkin C. Routine HIV testing within the emergency department of a major trauma centre: a pilot study. *HIV Med.* 2015.DOI: 10.1111/hiv.12216
- 31) College of Emergency Medicine. *The Way Ahead 2008-2012: Strategy and guidance for Emergency Medicine in the United Kingdom and the Republic of Ireland.* London, 2008.
- 32) Cochrane A, Collins P, Horwood J. Barriers and opportunities for hepatitis B testing and contact tracing in a UK Somali population: a qualitative study. *Eur J Public Health*, 2016;26(3):389–395
- 33) Harris M, Ward E, Gore C. Finding the undiagnosed: A qualitative exploration of hepatitis C diagnosis delay in the United Kingdom. *J Viral Hepat.* 2016;23(6):479-86
- 34) Datta S, Horwood J, Hickman M, *et al.* Case-finding for hepatitis C in primary care: a mixed-methods service evaluation. *Br J Gen Pract.* 2014;64(619):e67-e74
- 35) Branson BM, Handsfield HH, Lampe MA, *et al.* Revised recommendations for HIV testing of adults, adolescents, and pregnant women in health-care settings. *MMWR Recomm Rep*; 2006.55(RR-14):1-17
- 36) Schnall R, Clark S, Olender S, *et al.* Providers' Perceptions of the Factors Influencing the Implementation of the New York State Mandatory HIV Testing Law in Two Urban Academic Emergency Departments. *Acad Emerg Med.* 2013.20(3):279-286
- 37) Torres G, Heffelfinger J, Pollack HA, *et al.* HIV Screening Programs in US Emergency Departments: A Cross-Site Comparison of Structure, Process, and Outcomes. *Ann Emerg Med.* 2011;58(1):s105-s113.
- 38) Thornton A, Rayment M, Elam G, *et al.* Exploring staff attitudes to routine HIV testing in non-traditional settings: a qualitative study in four healthcare facilities. *Sex Transm Infect*, 2012;88: 601-606
- 39) Waxman M, Popick R., Merchant R, *et al.* Ethical, Financial, and Legal Considerations to Implementing Emergency Department HIV Screening: A Report From the 2007 Conference of the National Emergency Department HIV Testing Consortium. *Annals of Emergency Medicine*, 2011;58(1):S34-s43
- 40) Chen JC, Goets M B, Feld J E, *et al.* A provider participatory implementation model for HIV testing in an ED, *American Journal on Emergency Medicine*, 2011;29:418-426.
- 41) Cowan E, Leider J, Velastegui L, *et al.* A Qualitative Assessment of Emergency Department Patients' Knowledge, Beliefs, Attitudes, and Acceptance Toward Revised HIV Testing Strategies. *Acad Emerg Med.* 2013;20(3):287-294
- 42) Christopoulos K, Massey A, Lopez A, *et al.* Patient Perspectives on the Experience of Being Newly Diagnosed with HIV in the Emergency Department/Urgent Care Clinic of a Public Hospital. *PLoS One*, 2013;8(8): doi.org/10.1371/journal.pone.0074199
- 43) Christopoulos KA, Weiser S, Koester K, *et al.* Understanding patient acceptance and refusal of HIV testing in the emergency department, *BMC Public Health*, 2012;12(3). doi.org/10.1186/1471-2458-12-3
- 44) Witzel TC, Weatherburn P, Rodger A, *et al.* Risk, reassurance and routine: a qualitative study of narrative understandings of the potential for HIV self-testing among men who have sex with men in England. *BMC Public Health.* 2017;17(491);DOI 10.1186/s12889-017-4370-0
- 45) Flowers P, Knussen C, Li J, McDaid L. Has testing been normalized? An analysis of changes in barriers to HIV testing among men who have sex with men between 2000 and 2010 in Scotland UK. *HIV Med.* 2013;14(2):92–8.
- 46) Lupton D, *The imperativeness of health: public health and the regulated body.* London: Sage 1995.

- 1  
2  
3 801 47) Sweeney L, Owiti J, Beharry A, et al. Informing the design of a national screening and treatment programme for chronic viral  
4 802 hepatitis in primary care: qualitative study of at-risk immigrant communities and healthcare professionals, *BMC Health Serv Res*  
5 803 2015; 15:97; doi.org/10.1186/s12913-015-0746-y  
6 804  
7 805 48) D'Almeida KW, Kierzek G, Truchis P, et al. Modest Public Health Impact of Nontargeted Human Immunodeficiency Virus  
8 806 Screening in 29 Emergency Departments, *Archives for International Medicine*, 2011;535: doi: 10.1001/archinternmed.2011.535  
9 807  
10 808 49) Waxman M J, Merchant R C, Celada M T, et al. Perspectives on the ethical concerns and justifications of the 2006 Centers for  
11 809 Disease Control and Prevention HIV testing: HIV screening policy changes *BMC Med Ethics*, 2013;14: 46; doi:10.1186/1472-  
12 810 6939-14-46  
13 811  
14 812 50) Petersen A, Davis M, Fraser S, et al. Healthy living and citizenship: an overview, *Crit Public Health*, 2010;20(4):391-400, DOI:  
15 813 10.1080/09581596.2010.518379  
16 814  
17 815 51) Rose, N. and Novas, C., 2005. Biological citizenship. In: A. Ong and S.J. Collier, eds. *Global assemblages: technology, politics, and*  
18 816 *ethics as anthropological problems*. Malden, MA and Oxford: Blackwell Publishing.  
19 817  
20 818 52) Petryna, A., 2002. *Life exposed: biological citizens after Chernobyl*. Princeton, NJ and Oxford: Princeton University Press.  
21 819  
22 820 53) Boydell N, Buston K, McDaid L. Patterns of HIV testing practices among young gay and bisexual men living in Scotland: a  
23 821 qualitative study, *BMC Public Health*, 2017;17:660; doi:10.1186/s12889-017-4653-5  
24 822  
25 823 54) Flowers P, Estcourt C, Sonnenberg P, et al. HIV testing intervention development among men who have sex with men in the  
26 824 developed world, *Sex Health*, 2017;18:80-88  
27 825  
28 826 55) Flowers P. HIV transitions: consequences for self in an era of medicalisation. In: Davis M, Squire C, eds. *HIV Treatment and*  
29 827 *Prevention Technologies in International Perspective*. Basingstoke: Palgrave Macmillan, 2010; 109–125.  
30 828  
31 829 56) Orkin C, Flanagan S, Wallis E, et al. Incorporating HIV/hepatitis B virus/hepatitis C virus combined testing into routine blood  
32 830 tests in nine UK Emergency Departments: the "Going Viral". *HIV Med*, 2016;17:222-230  
33 831  
34 832 57) Strauss AL, Corbin JM. Grounded theory procedures and techniques. Newbury Park, CA: Sage Publications, 1990.  
35 833  
36 834 58) Green J and Thorogood T. (2014). *Qualitative Methods for Health Research*. Third edition (2014), Sage Publications; London  
37 835  
38 836 59) Rhodes T, Closson EF, Papparini S, et al. Towards "evidence-making intervention" approaches in the social science of  
39 837 implementation science: The making of methadone in East Africa. *Int J Drug Policy* 2016;30:17-26  
40 838  
41 839 60) Mol, A. (2002). *The body multiple*. Durham, NC: Duke University Press.  
42  
43  
44  
45  
46  
47  
48  
49  
50  
51  
52  
53  
54  
55  
56  
57  
58  
59  
60



**CONSOLIDATED CRITERIA FOR REPORTING QUALITATIVE STUDIES (COREQ): 32-ITEM CHECKLIST FOR INTERVIEWS AND FOCUS GROUPS**

| NUMBER                                         | ITEM                                     | GUIDE/QUESTION/DESCRIPTION                                                                                                                       | RESPONSE                                                                                        | PAGE |
|------------------------------------------------|------------------------------------------|--------------------------------------------------------------------------------------------------------------------------------------------------|-------------------------------------------------------------------------------------------------|------|
| <b>Domain 1: Research team and reflexivity</b> |                                          |                                                                                                                                                  |                                                                                                 |      |
| Personal Characteristics                       |                                          |                                                                                                                                                  |                                                                                                 |      |
| 1                                              | Interviewer                              | Which author/s conducted the interview or focus group?                                                                                           | Lucy Cullen                                                                                     | 7    |
| 2                                              | Credentials                              | What were the researcher's credentials? <i>E.g. PhD, MD</i>                                                                                      | MSc, PhD Candidate                                                                              |      |
| 3                                              | Occupation                               | What was their occupation at the time of the study?                                                                                              | Social Science Researcher                                                                       |      |
| 4                                              | Gender                                   | Was the researcher male or female?                                                                                                               | Female                                                                                          |      |
| 5                                              | Experience and training                  | What experience or training did the researcher have?                                                                                             | Qualitative Research Methods Training; 3+ years qualitative health research/analysis experience |      |
| Relationship with participants                 |                                          |                                                                                                                                                  |                                                                                                 |      |
| 6                                              | Relationship established                 | Was a relationship established prior to study commencement?                                                                                      | No                                                                                              | 7    |
| 7                                              | Participant knowledge of the interviewer | What did the participants know about the researcher? <i>e.g. personal goals, reasons for doing the research</i>                                  | As informed during consent process                                                              | 7    |
| 8                                              | Interviewer characteristics              | What characteristics were reported about the interviewer/facilitator? <i>e.g. Bias, assumptions, reasons and interests in the research topic</i> | As informed during consent process                                                              | 7    |
| <b>Domain 2: study design</b>                  |                                          |                                                                                                                                                  |                                                                                                 |      |
| Theoretical framework                          |                                          |                                                                                                                                                  |                                                                                                 |      |
| 9                                              | Methodological orientation and           | What methodological orientation was stated to                                                                                                    | Grounded approach to qualitative                                                                | 7    |

|    |                              |                                                                                                                   |                                                         |     |
|----|------------------------------|-------------------------------------------------------------------------------------------------------------------|---------------------------------------------------------|-----|
|    | Theory                       | underpin the study? <i>e.g. grounded theory, discourse analysis, ethnography, phenomenology, content analysis</i> | thematic analysis                                       |     |
|    | Participant selection        |                                                                                                                   |                                                         |     |
| 10 | Sampling                     | How were participants selected? <i>e.g. purposive, convenience, consecutive, snowball</i>                         | purposive                                               | 7   |
| 11 | Method of approach           | How were participants approached? <i>e.g. face-to-face, telephone, mail, email</i>                                | Face-to-face                                            | 7   |
| 12 | Sample size                  | How many participants were in the study?                                                                          | 22                                                      | 6   |
| 13 | Non-participation            | How many people refused to participate or dropped out? Reasons?                                                   | None dropped out                                        |     |
|    | Setting                      |                                                                                                                   |                                                         |     |
| 14 | Setting of data collection   | Where was the data collected? <i>e.g. home, clinic, workplace</i>                                                 | clinic                                                  | 7   |
| 15 | Presence of non-participants | Was anyone else present besides the participants and researchers?                                                 | no                                                      | 7   |
| 16 | Description of sample        | What are the important characteristics of the sample? <i>e.g. demographic data, date</i>                          | Sex; age; ethnicity; test response                      | 7/9 |
|    | Data collection              |                                                                                                                   |                                                         |     |
| 17 | Interview guide              | Were questions, prompts, guides provided by the authors? Was it pilot tested?                                     | Guided areas of discussion but not prescribed questions | 7   |
| 18 | Repeat Interviews            | Were repeat interviews carried out? If yes, how many?                                                             | No                                                      |     |
| 19 | Audio/visual recording       | Did the research use audio or visual recording to collect the data?                                               | Yes                                                     | 7   |
| 20 | Field notes                  | Were field notes made during and/or after the interview or focus group?                                           | Yes                                                     |     |
| 21 | Duration                     | What was the duration of the interviews or focus group?                                                           | 20-50 minutes (depending on availability)               | 7   |

|                                        |                                |                                                                                                                                          |                                                                                                   |       |
|----------------------------------------|--------------------------------|------------------------------------------------------------------------------------------------------------------------------------------|---------------------------------------------------------------------------------------------------|-------|
| 22                                     | Data saturation                | Was data saturation discussed?                                                                                                           | No (limits to sample size discussed)                                                              |       |
| 23                                     | Transcripts returned           | Were transcripts returned to participants for comment and/or correction?                                                                 | No                                                                                                |       |
| <b>Domain 3: analysis and findings</b> |                                |                                                                                                                                          |                                                                                                   |       |
| Data analysis                          |                                |                                                                                                                                          |                                                                                                   |       |
| 24                                     | Number of data coders          | How many data coders coded the data?                                                                                                     | Coding developed concurrently with data generation; reviewed and developed with second researcher |       |
| 25                                     | Description of the coding tree | Did authors provide a description of the coding tree?                                                                                    | No                                                                                                |       |
| 26                                     | Derivation of themes           | Were themes identified in advance or derived from the data?                                                                              | Primarily derived from data though some a priori areas explored                                   | 7     |
| 27                                     | Software                       | What software, if applicable, was used to manage the data?                                                                               | None                                                                                              |       |
| 28                                     | Participant checking           | Did participants provide feedback on the findings?                                                                                       | No                                                                                                |       |
| Reporting                              |                                |                                                                                                                                          |                                                                                                   |       |
| 29                                     | Questions presented            | Were participant quotations presented to illustrate the themes / findings? Was each quotation identified? e.g. <i>participant number</i> | Yes; Yes                                                                                          | 10-15 |
| 30                                     | Data and findings consistent   | Was there consistency between the data presented and the findings?                                                                       | Yes                                                                                               | 10-15 |
| 31                                     | Clarity of major themes        | Were major themes clearly presented in the findings?                                                                                     | Yes                                                                                               | 10-15 |
| 32                                     | Clarity of minor themes        | Is there a description of diverse cases or discussion of minor themes?                                                                   | Yes                                                                                               | 10-15 |

# BMJ Open

## 'Just another vial...': A qualitative study to explore the acceptability and feasibility of routine blood-borne virus testing in an emergency department setting in the UK

|                                 |                                                                                                                                                                                                                                                                                                                                                                                                                                                                                                                                                                                                                                                                                                                                                                                                                                                                                                                                                                                                                                                    |
|---------------------------------|----------------------------------------------------------------------------------------------------------------------------------------------------------------------------------------------------------------------------------------------------------------------------------------------------------------------------------------------------------------------------------------------------------------------------------------------------------------------------------------------------------------------------------------------------------------------------------------------------------------------------------------------------------------------------------------------------------------------------------------------------------------------------------------------------------------------------------------------------------------------------------------------------------------------------------------------------------------------------------------------------------------------------------------------------|
| Journal:                        | <i>BMJ Open</i>                                                                                                                                                                                                                                                                                                                                                                                                                                                                                                                                                                                                                                                                                                                                                                                                                                                                                                                                                                                                                                    |
| Manuscript ID                   | bmjopen-2018-024085.R1                                                                                                                                                                                                                                                                                                                                                                                                                                                                                                                                                                                                                                                                                                                                                                                                                                                                                                                                                                                                                             |
| Article Type:                   | Research                                                                                                                                                                                                                                                                                                                                                                                                                                                                                                                                                                                                                                                                                                                                                                                                                                                                                                                                                                                                                                           |
| Date Submitted by the Author:   | 26-Jan-2019                                                                                                                                                                                                                                                                                                                                                                                                                                                                                                                                                                                                                                                                                                                                                                                                                                                                                                                                                                                                                                        |
| Complete List of Authors:       | Cullen, Lucy; London School of Hygiene and Tropical Medicine Faculty of Public Health and Policy, Department of Public Health, Environments and Society; National Institute for Health Research Health Protection Unit Grenfell, Pippa; London School of Hygiene and Tropical Medicine Faculty of Public Health and Policy, Department of Public Health, Environments and Society; National Institute for Health Research Health Protection Unit<br>Rodger, Alison; University College London, Institute for Global Health; National Institute for Health Research Health Protection Unit<br>Orkin, Chloe; Barts Health NHS Trust, HIV Medicine<br>Mandal, Sema; Public Health England, Immunisation, Hepatitis, Blood Safety and Countermeasures Response; National Institute for Health Research Health Protection Unit<br>Rhodes, Tim; London School of Hygiene and Tropical Medicine Faculty of Public Health and Policy, Department of Public Health, Environments and Society; National Institute for Health Research Health Protection Unit |
| <b>Primary Subject Heading</b>: | Public health                                                                                                                                                                                                                                                                                                                                                                                                                                                                                                                                                                                                                                                                                                                                                                                                                                                                                                                                                                                                                                      |
| Secondary Subject Heading:      | Qualitative research                                                                                                                                                                                                                                                                                                                                                                                                                                                                                                                                                                                                                                                                                                                                                                                                                                                                                                                                                                                                                               |
| Keywords:                       | HIV & AIDS < INFECTIOUS DISEASES, VIRAL HEPATITIS, ACCIDENT & EMERGENCY MEDICINE, TESTING, QUALITATIVE RESEARCH                                                                                                                                                                                                                                                                                                                                                                                                                                                                                                                                                                                                                                                                                                                                                                                                                                                                                                                                    |
|                                 |                                                                                                                                                                                                                                                                                                                                                                                                                                                                                                                                                                                                                                                                                                                                                                                                                                                                                                                                                                                                                                                    |

SCHOLARONE™  
Manuscripts

1  
2  
3 1 *BMJ OPEN: submitted 08.05.2018*  
4 2  
5 3  
6 4  
7 5

8 6 **'Just another vial...': a qualitative study to explore the acceptability and feasibility of routine**  
9  
10 7 **blood-borne virus testing in an emergency department setting in the UK**  
11  
12 8  
13 9  
14 10  
15 11

16 12 AUTHORS

17 13 Lucy Cullen 1,5; Pippa Grenfell 1,5; Alison Rodger 2,5; Chloe Orkin 3; Sema Mandal 4,5; Tim Rhodes 1,5,6  
18 14  
19 15

20 16 INSTITUTIONAL AFFILIATIONS

- 21 17 1. Department of Public Health, Environments and Society, London School of Hygiene and Tropical Medicine,  
22 18 London, UK  
23 19 2. Institute for Global Health, University College London, London, UK  
24 20 3. HIV Medicine, Barts Health NHS Trust, London, UK  
25 21 4. Immunisation, Hepatitis, Blood Safety and Countermeasures Response, Public Health England, London, UK  
26 22 5. National Institute for Health Research Health Protection Research Unit (NIHR HPRU) in Blood Borne and  
27 23 Sexually Transmitted Infections  
28 24 6. National Centre for Social Research on Health, University of New South Wales, Sydney, Australia  
29 25  
30 26  
31 27

32 28 CORRESPONDING AUTHOR

33 29 Pippa Grenfell [pippa.grenfell@lshtm.ac.uk](mailto:pippa.grenfell@lshtm.ac.uk)  
34 30 15-17 Tavistock Place, Kings Cross, London WC1H 9SH  
35 31  
36 32

37 33 EMAIL ADDRESSES

38 34 Lucy Cullen: [lucy.cullen@lshtm.ac.uk](mailto:lucy.cullen@lshtm.ac.uk)  
39 35 Dr Pippa Grenfell: [pippa.grenfell@lshtm.ac.uk](mailto:pippa.grenfell@lshtm.ac.uk)  
40 36 Professor Alison Rodger: [alison.rodger@ucl.ac.uk](mailto:alison.rodger@ucl.ac.uk)  
41 37 Professor Chloe Orkin: [Chloe.Orkin@bartshealth.nhs.uk](mailto:Chloe.Orkin@bartshealth.nhs.uk)  
42 38 Dr Sema Mandal: [sema.mandal@phe.gov.uk](mailto:sema.mandal@phe.gov.uk)  
43 39 Professor Tim Rhodes: [tim.rhodes@lshtm.ac.uk](mailto:tim.rhodes@lshtm.ac.uk)  
44 40  
45 41  
46 42

47 43 ARTICLE RUNNING HEAD

48 44 Routine blood-borne virus testing in the ED setting  
49 45  
50  
51 46  
52  
53 47 Word Count: 6286  
54  
55  
56  
57  
58  
59  
60

1  
2  
3 48 **ABSTRACT**  
4  
5 49

6 50 **Objectives:** Increased test-uptake for HIV and viral hepatitis is fast becoming a health priority at both the  
7 51 national and global level. Late diagnosis of these infections remains a critical public health concern within the  
8 52 UK. Recommendations have been issued to expand blood-borne virus (BBV) testing in alternative settings.  
9 53 Emergency Departments (ED) offer a potentially important point of testing. This paper presents findings from a  
10 54 qualitative study which aimed to explore the acceptability and feasibility of a routine opt-out combined blood-  
11 55 borne virus testing intervention implemented at an inner London ED.  
12  
13  
14  
15  
16

17 57 **Methods:** We conducted 22 semi-structured interviews with ED patients and service providers over a four  
18 58 month period during the intervention pilot. A grounded analytical approach was employed to conduct  
19 59 thematic analysis of qualitative study data.  
20  
21  
22

23 61 **Results:** Core interrelating thematic areas identified and analytically developed in relation to test-intervention  
24 62 implementation and experience included: the remaking of routine test-procedure; notions of responsibility in  
25 63 relation to status knowledge and test-engagement; the opportunity and constraints of the emergency  
26 64 department as a site for testing; and the renegotiation of testing cultures within and beyond the clinic space.  
27  
28  
29

30 66 **Conclusion:** Study findings demonstrate how relational and spatial dynamics specific to the ED setting shape  
31 67 test-meaning and engagement. We found acceptability of the test practice was articulated through narratives  
32 68 of situated responsibility, with the value of the test offset by perceptions of health-need and justification of  
33 69 the test expense. Participant accounts indicate the non-targeted approach of the test to afford a productive  
34 70 disruption to 'at risk' identities, yet also reveal limits to the test-interventions' 'normalising' effect. Evaluation  
35 71 of the intervention must attend to the situated dynamics of the test practice if opportunities of an opt-out BBV  
36 72 test procedure are to be fully realised. Findings also highlight the critical need and to further evaluate post-test  
37 73 intervention practices and experiences.  
38  
39  
40  
41  
42

43 74  
44 75 **KEYWORDS:** HIV; Viral Hepatitis; Emergency Department; Testing; Qualitative  
45  
46  
47  
48  
49  
50  
51  
52  
53  
54  
55  
56  
57  
58  
59  
60

### Strengths and limitations of this study

- Employing qualitative research methods we draw from twenty-two semi-structured interviews to examine the acceptability and feasibility of a novel three-combined blood-borne virus routine test-intervention implemented in an emergency department (ED) setting in the UK.
- The study offers an enriched understanding of ED patient and provider perspectives and experiences of the intervention that may inform and facilitate improved implementation of the initiative should the pilot be expanded.
- A key limitation to the study was interviewing participants at point of clinic contact only, and thus not being able to explore critical dimensions of the post-test experience, and more particularly the perceptions and experiences of those diagnosed through routine ED BBV testing.
- We are aware that the small sample size does not include individuals who felt themselves to be at risk of a positive result, which would likely affect test-engagement and intervention experience.
- We acknowledge that qualitative data produced within and through this particular study context limits the generalisability of study findings beyond the primary setting.

1  
2  
3 98 **'Just another vial...': a qualitative study to explore the acceptability and feasibility of routine**  
4  
5 99 **blood-borne virus testing in an emergency department setting in the UK**  
6  
7 100  
8 101

9 102 **INTRODUCTION**  
10 103

11 104 Recent years have seen the continuing development of more effective and tolerable treatments for viral  
12 105 hepatitis and HIV. Yet the late diagnosis of these infections, associated with poorer individual health outcomes  
13 106 and increased population transmission, remains a prominent health concern at both the state,[1-4] and  
14 107 global,[5-8] level. Delayed access to HIV treatment increases the risk of severe health complications and  
15 108 premature mortality,[9-12] as well as onward transmission.[13-15] Global estimates indicate that hepatitis B  
16 109 (HBV) and hepatitis C (HCV) infection account for 47% and 48%, respectively, of the annual 1.4 million deaths  
17 110 from hepatitis-related liver cirrhosis and cancer.[6] Estimates further indicate HBV and HCV diagnosis to be  
18 111 critically low at 9% (HBV) and 20% (HCV).[7] Care cascade models demonstrate that low testing rates are a  
19 112 principal limitation to the 'success' of public health targets of treated viral hepatitis and HIV viral suppression.  
20 113 With blood-borne virus (BBV) testing and case-diagnosis sub-optimal, increased test-uptake remains a critical  
21 114 national and global priority for treatment benefits to be fully realised. [10,16,6]  
22 115

23 116 Within the UK, of the estimated 101,200 people living with HIV in 2015, as many as 13,500 were unaware of  
24 117 their status.[17] While the first UNAIDS 90-90-90 target (ninety percent of people living with HIV being aware  
25 118 of their status) was reached in London in 2016, nationwide figures fell short at 88%.[2] In that year, 42% of HIV  
26 119 diagnosis were made during later stages of infection.[4] Late diagnosis and low treatment rates for hepatitis B  
27 120 (HBV) and HCV are reflected in UK hospital admissions and mortality from HCV-related end-stage liver disease,  
28 121 and HCV or HBV-related liver cancer.[3,18,19] Undiagnosed HCV cases among people who inject drugs, the  
29 122 major risk group for HCV infection in the UK, are estimated to be high.[20] The British HIV Association and  
30 123 National Institute for Health and Care Excellence (2008 and 2013 respectively) have issued recommendations  
31 124 to increase uptake for BBV testing in alternative settings.[21-22] Ongoing efforts to reduce late HIV diagnosis  
32 125 (defined as a CD4 count of less than 350 mm),[23] alongside shifts in policy toward HIV prevention, have  
33 126 sought to expand HIV-testing initiatives both within and beyond the clinic environment.[24-29] This has  
34 127 included opt-out testing procedures where individuals are informed that a test will be conducted unless they  
35 128 indicate they do not want to be tested.  
36 129

37 130 Emergency Departments (hereafter referred to as ED) offer a potentially important point of testing [30]. It has  
38 131 been estimated that around one in four of the population in the UK and Republic of Ireland attend EDs in any  
39 132 one year.[31] For individuals not registered with GPs, including migrant populations disproportionately  
40 133 affected by HIV and chronic hepatitis B and C infection,[17,32] EDs can present a primary point of health-  
41 134 service contact. Routine opt-out testing in the ED setting may also offer case-finding potential for individuals  
42  
43  
44  
45  
46  
47  
48  
49  
50  
51  
52  
53  
54  
55  
56  
57  
58  
59  
60



1  
2  
3 135 no longer identified as 'at risk' – such as people who used to inject drugs – who remain undiagnosed through  
4 136 GP or other health service contact until an advanced disease stage.[33-34]

5 137  
6  
7  
8 138 Much of the global literature on routine HIV testing in EDs has emerged from the US in response to the 2006  
9 139 Centre for Disease Control and Prevention (CDC) guideline revisions.[35] International evaluation of service  
10 140 provider perspectives has identified resource-cost and the efficacy of routine-test approaches a critical  
11 141 concern.[36-38] While conscious of the potential public health benefits, some view routine HIV testing to sit  
12 142 beyond the remit of emergency medical practice.[39-40] US-based examinations of patient perceptions and  
13 143 experiences have revealed levels of confusion around opt-out testing procedures.[41] Yet studies have also  
14 144 identified an acceptability of ED-based routine testing grounded in status curiosity and routes of reassurance,  
15 145 alongside the convenience of the test-opportunity while accessing clinic services.[42-43] Patient concerns  
16 146 about routine-testing procedures have centred on issues of confidentiality and the social implications of a  
17 147 positive result. [42] HIV test-practice and engagement thus remains both an individually and socially  
18 148 negotiated process.[44-45]

19 149  
20 150 Aspirations that routine BBV testing in more generalised clinic environments could help normalise HIV test  
21 151 practices, and lessen illness-related stigma, speak to the enduring concern that negative attitudes around HIV  
22 152 continue to impede test uptake and diagnosis across high-income settings. Despite improved medical realities  
23 153 of hepatitis cure,[3] and near-normal life expectancy for those diagnosed early and able to access HIV  
24 154 treatment,[9] the social meaning of an illness and related test-practices are less easily reconfigured. Test  
25 155 practices and engagement, situated in socio-cultural systems of meaning, may also confer risk-  
26 156 association.[46] Continued misconceptions of hepatitis infection and transmission, alongside the  
27 157 stigmatisation of associated risk-behaviours negatively impact hepatitis case identification and diagnosis  
28 158 across the UK.[33,34,47] While shifts in HIV testing norms have been witnessed among some communities  
29 159 within the UK, perceptions of the social risk attached to both test-engagement and a potential positive result  
30 160 continue to limit test-uptake and frequency of testing.[44-45] Debate concerning the value of non-targeted vs  
31 161 targeted test-approaches in the HIV field remains ongoing.[38,48,49] Some have argued that targeted HIV-  
32 162 testing centring on risk-assessment is necessary in the ED setting to ensure that patient interests and ethics of  
33 163 practice are protected in .[49] Others have voiced concerns that continued medical segregation and targeted  
34 164 test-practices perpetuate an HIV exceptionalism, illness stigma, and subsequent test anxiety.[38-39] How test-  
35 165 meaning is configured and negotiated through a routine practice in the ED setting, and the implication for test-  
36 166 engagement and uptake, is an important dimension of intervention potential.

37 167  
38 168 Critical also to the evaluation of emergent test-technologies across the clinical, community – and more  
39 169 recently domestic – spheres, is an understanding of how 'responsibilisation' discourses shape health-seeking  
40 170 norms and practices. The concept of 'biological citizenship', which conveys an individualised responsibility to  
41 171 act in keeping with both private and collective health,[50-52] can be used to how test-technologies and  
42 172 practice function as enactments of health citizenship.[53,44] The dynamics of social, political and biomedical

1  
2  
3 173 expectation that emerge - as novel test-technologies are encountered and negotiated relative to existing test-  
4 174 practices and clinical procedures, warrants critical reflection. Attending to the 'behavioural domain' and  
5 175 psychosocial complexity of test-practice and engagement amidst broader 'normalisation' processes,[54-55]  
6 176 remains critical in evaluating the efficacy and value of an intervening test-technology.  
7  
8 177

9  
10 178 UK-based qualitative research specific to opt-out BBV testing in the ED setting remains limited. To our  
11 179 knowledge, there has been no patient-focused analysis of opt-out HIV testing in UK emergency departments to  
12 180 date, nor any qualitative inquiry of ED-based routine opt-out testing for HCV and HBV. This study aimed to  
13 181 explore the acceptability and feasibility of a combined HIV, HCV and HBV routine opt-out testing initiative  
14 182 delivered to adult patients receiving routine bloods as part of their emergency care, from the perspectives of  
15 183 emergency department patients and staff. The work offers a theoretically driven examination of intervention  
16 184 practice and experience alongside an applied value to inform in any potential expansion of the test initiative.  
17 185 The study looks at both the immediate responses to the intervention components and test event, but also at  
18 186 how these experiences are shaped by, and potentially renegotiate, broader social norms and forms of test  
19 187 practice and engagement.  
20  
21 188

## 22 189

## 23 190 **METHODS**

## 24 191

25 192 This paper draws on findings from a pilot qualitative study conducted to explore patient and provider  
26 193 responses to a combined BBV testing intervention implemented at an inner London ED.[56] Twenty-two semi-  
27 194 structured interviews were conducted with ED patients (n = 18) and service providers (n = 4) between May-  
28 195 August 2016.  
29  
30 196

31 197 Under the BBV-test initiative, all ED patients over the age of 18 who have blood samples taken as part of their  
32 198 emergency care are routinely tested for HIV, HCV and HBV, unless they specifically opt-out of the test. Health  
33 199 professionals taking the blood sample verbally explain to ED attendees that all patients are being routinely  
34 200 tested for the three viruses, unless they indicate they do not want to be. Tests are offered to all adult patients  
35 201 having bloods taken, except those individuals who do not have the capacity to consent (for example on  
36 202 account of a psychotic illness or cognitive impairment) and those where the test offer cannot be verbally  
37 203 communicated and agreed to (for example across language barriers). Where tests are accepted, an extra vial  
38 204 of blood is drawn. Information relating to the testing intervention was made available through leaflets in the  
39 205 department (English language only), with posters displayed within ED waiting areas and assessment cubicles  
40 206 where bloods are taken. Test results operated on a 'no news is good news' policy. Those patients returning a  
41 207 positive serological result for any of the tested viruses were contacted within fourteen days and specialist  
42 208 consultation arranged.  
43  
44 209

1  
2  
3 210 We sought to recruit both ED patients and staff participants, so as to explore the multiple dimensions of test  
4 211 expectation and experience that frame the intervention. Patient participants were sampled from individuals  
5 212 accessing ED services who had bloods taken as part of their emergency care and included individuals who were  
6 213 offered and accepted the BBV test (n = 10); individuals offered the test but who opted-out (n = 1); and  
7 214 individuals who did not recall being offered the intervention, assumed not-tested (n = 7). Insofar as was  
8 215 possible, we sought to include patients across a range of ages, genders and ethnic backgrounds to capture the  
9 216 diversity of the ED population. We spoke with nine female and nine male ED patients, between 23 and 82  
10 217 years in age, of varying ethnicities (see Table 1 for information relating to patient participants). Patient and  
11 218 staff participants were recruited across different times of the day/evening, both during the week and at  
12 219 weekends to reflect variations in patient populations and department workloads. Health professionals were  
13 220 sampled from staff members directly involved in taking bloods and implementing the test-intervention. Staff  
14 221 participants included both women and men of different staff grades, who had worked at the department for  
15 222 between three and eight years.

16 223  
17 224 Interview discussions were semi-structured, shaped by a topic guide developed by the research team but also  
18 225 guided by participants' responses. Interviews commenced after participants gave written informed consent  
19 226 and, with their permission, were audio-recorded. While interpretation services had been identified if required,  
20 227 all interviews were conducted in English. Data was collected by LC who was not known to participants prior to  
21 228 the study, with all interviews conducted on the ED site. Interviews lasted between 20 and 50 minutes, as  
22 229 determined by patient and staff availability. Interviews were immediately stopped in the event of the patient  
23 230 receiving further medical care. While interviews were resumed wherever possible, in cases where patient  
24 231 participants were transferred to other hospital departments or discharged, interviews could not always be  
25 232 concluded. Interview participants were asked about their: views and (where applicable) direct experiences of  
26 233 the test intervention; previous test experiences and current test practices; knowledge and awareness of HIV,  
27 234 HCV and HBV viruses, transmission-risks and treatments; felt and perceived barriers and facilitators to BBV  
28 235 testing; and the felt appropriateness of the emergency department as a site for testing.

29 236  
30 237 All interview data were transcribed verbatim, with personal identifying details removed. In keeping with a  
31 238 grounded analytical approach to inform thematic development,[57-58] preliminary data coding and analysis  
32 239 commenced early in data collection, informing later interviews and allowing for emerging themes to be further  
33 240 explored across patient and staff accounts. Initial coding examined both a priori interests as well as inductive  
34 241 codes grounded in the study data. Secondary-level thematic coding was later conducted across the full dataset  
35 242 to further fracture the data and allow for the development of conceptually-driven categories, drawing on  
36 243 relevant theoretical literature, particularly in relation to responsabilisation and biological/health citizenship  
37 244 [50-53]. Points of tension and convergence in relation to emerging thematic areas were explored both  
38 245 between attendee accounts and across attendee and provider responses. Core thematic areas to emerge  
39 246 included: the renegotiating of routine procedure; felt and perceived testing responsibilities; the opportunity

1  
2  
3 247 and limitations of the ED as a site for testing; the interplay of testing cultures within and beyond the clinic. All  
4 248 names used in the analysis are pseudonyms.

5 249  
6 249  
7  
8 250 This study was undertaken as part of the National Institute for Health Research Health Protection Research  
9 251 Unit (NIHR HPRU) in Blood Borne and Sexually Transmitted Infections at University College London in  
10 252 partnership with Public Health England and in collaboration with the London School of Hygiene and Tropical  
11 253 Medicine. The study was granted ethical approval form the West Midlands–South Birmingham Research Ethics  
12 254 Committee, and the London School of Hygiene and Tropical Medicine Ethics Committee.

13 255  
14 255  
15 255  
16 256 *Patient and Public Involvement:* Pre-study consultations were conducted with community organisation  
17 257 representatives working in the HIV, HCV and HBV fields to inform the design of the study. ED patients were not  
18 258 involved in the study design phase of the research. All study outputs and publications will be disseminated to  
19 259 those study participants who opted to give contact details for this purpose.

20 260  
21 261  
22  
23  
24  
25  
26  
27  
28  
29  
30  
31  
32  
33  
34  
35  
36  
37  
38  
39  
40  
41  
42  
43  
44  
45  
46  
47  
48  
49  
50  
51  
52  
53  
54  
55  
56  
57  
58  
59  
60

262 **Table 1: Patient participant information**

263

264

265 **Pseudonym**      **Gender**      **Age**      **Region of origin**      **BBV test-intervention response**

266

267 *Ryan*      Male      18-29      North America      BBV test offer declined268 *Sofiya*      Female      30-49      East Europe      BBV test offer not recalled, assumed not tested269 *Carlotta*      Female      18-29      West Europe (excl UK)      BBV test offer accepted270 *Malcom*      Male      30-49      UK      BBV test offer not recalled, assumed not tested271 *Karen*      Female      (30-49\*)      UK      BBV test offer accepted272 *Ramisa*      Female      (30-49\*)      South Asia      BBV test offer accepted273 *Phil*      Male      30-49      UK      BBV test offer accepted274 *Ehsan*      Male      (50+\*)      Middle East      BBV test offer not recalled, assumed not tested275 *Sten*      Male      30-49      West Europe      BBV test offer not recalled, assumed not tested276 *Dennis*      Male      50+      UK      BBV test offer accepted277 *Hana*      Female      18-29      South Europe      BBV test offer not recalled, assumed not tested278 *Julia*      Female      (18-29\*)      West Europe      BBV test offer not recalled, assumed not tested279 *Matas*      Male      30-49      East Europe      BBV test offer not recalled, assumed not tested280 *Dan*      Male      30-49      UK      BBV test offer accepted281 *Imogen*      Female      50+      UK      BBV test offer accepted282 *Ishani*      Female      30-49      UK      BBV test offer accepted283 *Lena*      Female      18-29      East Europe      BBV test offer accepted284 *Khaled*      Male      (30-49\*)      Middle East      BBV test offer not recalled, assumed not tested

285

286

287

288

- 289 • A number of patient interviews were interrupted due to patient care pathways. In cases where interviews were not able to be resumed (for example where patients were transferred/discharged), patient information has insofar as is possible been extracted from interview data. Where patient ages were not available, an age-range estimate has been given based on biographical information given by patients during the interview.

293

## 294 RESULTS

295 Our study findings report on the perceptions and experiences of ED patients and service providers in response  
296 to the implementation of routine blood-borne virus test-intervention in a UK ED setting. While not all patient-  
297 participants were offered the intervention, in being eligible for intervention-practice they contributed valuable  
298 insight into the acceptability, feasibility and limitations of the ED as a site for routine BBV testing. Our analysis  
299 explores the intervention's potential and practical negotiation through four interrelating thematic areas: the  
300 remaking of routine test-procedure; notions of responsibility in relation to status knowledge and test-  
301 engagement; the opportunity and constraints of the ED as a site for testing; and the renegotiation of testing  
302 cultures within and beyond the space of the clinic.

303

304

### 305 A remaking of routine

306 Processes of integrating an additional test into standard ED practice were shaped by staff and patient  
307 interactions with, and responses to, the various intervention components. A number of patient participants  
308 described themselves as having been too preoccupied and distracted to register the intervention posters – a  
309 'background' not properly taken in. Staff, in contrast, depicted the posters as an aid to intervention procedure;  
310 a visual reminder and point of reference in the assessment cubicle where blood samples are taken. Both  
311 patient and staff participants stressed the importance of how the verbal explanation was delivered; 'the way  
312 you say it', keeping it simple. Patient accounts make positive reference to the 'straightforward', 'low-key',  
313 'casual' and non-intrusive communication that presented the test as just another part of routine procedure; no  
314 fuss.

315

316 *the guy yesterday when he took it, he was so laid back about the one sentence that he made, that you*  
317 *almost didn't want to say no. It wasn't a big deal, do you see what I mean? Like, there was no*  
318 *negativity attached to the way he was talking (Ishani)*

319

320 Adapting the test procedure to the demands of an ED workflow appears to support a more neutral and  
321 accessible practice, where the *less* of the event helps bypass the potential 'negativity' of the test idea. Staff  
322 indicated that the presence of friends and relatives during blood procedures was common, but that  
323 communication surrounding the test did not typically sit apart from 'normal history-taking' and the established  
324 confidentiality of the room. While the intervention would at times be conducted in the presence of others, it  
325 was avoided in situations where those others were translating. The 'no news is good news' results system,  
326 while not infringing on patient decisions to test, was seen as less acceptable. The majority of patient  
327 participants indicated a preference to receive the test result, aware that 'mistakes happen'. The 'no news'  
328 window could potentially be anxiety provoking, particularly if status was a point of concern – a 'what if' that  
329 would benefit from a more definite confirmation: 'it would be nice to *know* so, you know' (Phil).

330

331 For some ED staff the extra vial has, over time, become habit. Increasingly 'more of a reflex action', the test-

332 offer was less something remembered or forgotten but rather just done, affording staff the opportunity to see  
333 how the test-practice both could and does fit with existing procedures:

334

335 *I think it's just, kind of like, there was an, "Oh, for goodness sake, yet another thing for us to do in our*  
336 *assessment cubicle," and then actually like, "Oh, no, this is, this is easy, this is not a problem."*

337 (clinic staff)

338

339 Yet complex clinic situations can render the intervention procedure more difficult to navigate. Ascertaining the  
340 extent to which the test had been effectively communicated across language barriers was a widely discussed  
341 concern. Staff also spoke of the difficulties of assessing capacity to consent for patients in more critical health  
342 conditions and particularly under the pressure of meeting immediate treatment demands.

343

344 *... it [conducting intervention] just depends on the sickness, I guess, how sick the patient is and how*  
345 *focused you are at trying to get all the treatment for the patient right in, done, and gauging are they*  
346 *actually understanding what you're saying at this point...* (clinic staff)

347

348 Staff accounts indicated that efforts to integrate the test into routine practice would often require a  
349 judgement call – individual assessments on whether or not the intervention should be offered, and then how  
350 well it had been understood and consented to. Ambiguities of intervention procedure exposed through  
351 complex, pressurised clinic situations – for example, whether to take blood samples from trauma patients in  
352 critical conditions and the extent to which other family members may become involved in this process – can  
353 give rise to divergent test practices with broader ethical implications, where the appropriateness of the test  
354 offer and delivery, and critically processes of patient consent, may become less apparent and acceptable to  
355 both staff and patients. Intervention implementation also meets ongoing resistance in the ED 'working  
356 environment', with high patient volume, intense workloads and rapid staff turnover impeding attempts to  
357 'remember' the still 'extra' blood vial. The volume of patients that underscores both the opportunity and  
358 advantage of ED-based testing is the same 'mass volume' that makes an altered routine more difficult to  
359 establish. In the context of a department 'struggling to do the basic things' while attending large numbers of  
360 acutely-ill patients, the extra vial is still felt to be an 'extra element' (clinic staff).

361

362

### 363 **A responsibility to know**

364 A prominent feature of participant accounts was the view that 'it's better to know'. Described as a 'good' and  
365 'important' thing to do, patient accounts indicate a generalised expectation not only to test, but to want to  
366 test – a route to 'feel[ing] healthier' and 'clean'.

367

368 *If these things are curable, then fine, they've heard something that they need to know. If they're not,*  
369 *then it gives them time to get themselves in order. I think it's always better to know than not know. Do*

1  
2  
3 370 *I believe that? Yes, I do, yeah. (Imogen)*  
4  
5 371

6 372 Expectations to test are further reinforced when treatment is known to be available. For Ehsan, the  
7  
8 373 'treatability' of HIV renders the phobia of testing less legitimate, a fear that should not still be there. Matas'  
9  
10 374 deferral of interferon treatment when diagnosed with hepatitis C four years previously, waiting to see if  
11  
12 375 'science comes up with anything better', contends the assumed linearity of a 'test and treat' ethic. Yet  
13  
14 376 managing the knowledge of a health condition was implied by Matas and others as something that just has to  
15  
16 377 be done; 'a bit unexpected but you know what can you do? It is like it is' (Matas); '... it's not going to be easy to  
17  
18 378 take, you know, but that's, that's life' (Malcom).

19 379  
20 380 Patient participants also voiced a public responsibility to know. This was positioned in relation to population  
21  
22 381 health – to ensure against onward transmission – but also direct to the state. For Imogen, expectations of state  
23  
24 382 support are reciprocated in expectations of individual health monitoring and management:  
25  
26 383

27 384 *we're adults, we're responsible for our actions [...] we need to check these things [...] that's, kind of,*  
28  
29 385 *part of my psyche, you look after yourself and you do not expect the health service to look after you.*  
30  
31 386 *Well, you do, but you have to have played your part.... (Imogen)*  
32  
33 387

34 388 Engaging with the 'free opportunity' of the test is implied to constitute an act of health-citizenship; a  
35  
36 389 demonstration of meeting expectations, being responsible, playing one's part. For the majority of participants  
37  
38 390 the right of the patient to choose was critical. Yet a small number felt the test should be 'obligatory'. Insofar as  
39  
40 391 infection poses a risk beyond the individual, the 'safeguard' of the test should be engaged with 'for the good of  
41  
42 392 society' (Ehsan). For Ehsan, the right to choose is a privilege of 'out there' that changes when you enter the  
43  
44 393 'here' of the ED clinic space. The act of accessing the service denotes a responsibility to the clinic network –  
45  
46 394 the people, place and resources that you have sought help from – that forgoes the right to decline.  
47  
48 395

49 396 All patient participants, irrespective of whether the test had been offered, indicated confidence in a negative  
50  
51 397 result. Those who accepted the test engaged with the practice either as a form of opportunistic assurance – a  
52  
53 398 'might as well' – or indifference – 'I'm not concerned about any of those things'. Tests actively sought in the  
54  
55 399 past were linked either to changes in relationship status or increased sense of risk. While participants indicated  
56  
57 400 they would initiate a test if they felt cause to do so, few said it would be something they would consider  
58  
59 401 otherwise. Without an explicit need test-engagement remains predominantly passive; 'it's on my to do list' –  
60  
61 402 thought about, but not a priority. In the absence of status anxiety acceding to new routine procedures is easily  
62  
63 403 done. How the test offer and practice would be received by those who feel more at risk is less apparent. A  
64  
65 404 potential reluctance to test was speculated in 'others' who might be more anxious about a positive result: 'the  
66  
67 405 thought of having something wrong with you, some people would rather not know' (Karen). Felt  
68  
69 406 responsibilities to know therefore sit relative to an anticipated reality of knowing, and the irreversible  
70  
71 407 knowledge-process enacted through the test event; 'once you know that's it, you know, you've got it' (Dan).



1  
2  
3 408  
4  
5 409  
6 410  
7  
8 411  
9 412  
10 413  
11 414  
12 415  
13  
14  
15 416  
16 417  
17 418  
18 419  
19 420  
20 421  
21 422  
22 423  
23 424  
24 425  
25 426  
26 427  
27 428  
28 429  
29 430  
30 431  
31 432  
32 433  
33 434  
34 435  
35 436  
36 437  
37 438  
38 439  
39 440  
40 441  
41 442  
42 443  
43 444  
44 445  
45  
46  
47  
48  
49  
50  
51  
52  
53  
54  
55  
56  
57  
58  
59  
60

### **A Time and place**

The appropriateness of the ED as a site for testing was questioned by a small number of patient participants. Ryan, though supportive of the offer, did not feel he had the mental capacity for it that day: 'I don't really want to pile on the bad news [...] I don't want a double-whammy – that would be an unpleasant day' (Ryan). For Khaled, the test conflicts with the principal tenet of the 'emergency' remit:

*emergency services is always full with emergencies so they have to deal with priorities [...] But that one is not that kind of priority because if you have it you have it, you cannot cure it by emergency services, you have to take a long term treatment* (Khaled)

Unless directly 'applicable' to a patient's differential diagnosis, the test should be conducted at some other time and some other place; 'emergency is for emergency' (Khaled). In tension with the overriding acceptability of the intervention was the less articulated counter narrative of *this isn't the time*.

Yet the more dominant narrative was one of presented opportunity. Participants who accepted the intervention commonly constructed the test offer as a well-situated add-on; 'they're taking bloods anyway'. The ease and convenience of an extra vial was thought to encourage people to test who otherwise would not have sought to do so.

*a person won't just go out there to have a HIV test, like on an ordinary day, they wouldn't even think about it [...] just imagine you spend your day and would I just go, "I'm going to go and have a HIV test today," they wouldn't ... because you think, 'Oh, I haven't got it, you know, I don't need to,' you wouldn't do it in a million years.* (Ramisa)

Despite taking time to integrate into pre-established blood-routines, staff indicated that the drawing of another vial from someone already having bloods taken was both minimal, but also practical: '... we are already putting a needle into somebody's vein, we are already taking blood' (clinic staff). The ED site offers a point of contact with individuals who, in the absence of felt risk, are neither testing nor thinking about testing. Opportunities of re-contact also present with individuals who have – as in the case of Matas – disengaged from care services. Unregistered with a GP Matas has had minimal service contact beyond intermittent visits to emergency care, remaining unaware of recent advances in HCV treatment options.

The ED setting also offers an alternative point of contact for HIV testing with individuals less able, or willing, to access sexual health services. For some participants the anonymity of a sexual health clinic afforded a heightened sense of privacy – 'there are no questions, no nothing' (Sten). For others, the visibility of the sexual health clinic presented complications, with service access potentially compromised in light of what being seen

1  
2  
3 446 in the clinic might imply:  
4  
5 447

6 448 *I will take an example of Muslim people like me. You will see loads of girls wearing scarf but doing*  
7  
8 449 *things that you're not supposed to do, then in the end case she thinks she has something, how she will*  
9 450 *go to sexual health clinic? Just example of people who are like me (Hana)*  
10  
11 451

12 452 For Ehsan, the sexual health clinic constitutes a space of heightened anxiety and concern; a difficult space to  
13  
14 453 enter that concedes both to the self and others not only that there is a problem, but that it is *this* type of  
15 454 problem.  
16  
17 455

18 456 *if you enter that building I think it's this... Not phobia, it's [...] it's that there is something seriously*  
19  
20 457 *wrong with you [...] it takes you to totally different atmosphere and you can feel it when you see*  
21 458 *people sitting down [...] there is a stigma attached to that building ... (Ehsan)*  
22  
23 459

24 460 In contrast to the known specificity of the sexual health clinic, Ehsan positions the ED setting as a place where  
25  
26 461 you do not feel that difference, there are 'too many different types of illnesses'. The ED supports a protective  
27  
28 462 anonymity and neutrality of space; accessed by all, where everyone has something going on but no one knows  
29 463 what exactly.  
30  
31 464

### 32 465

### 33 466 **Cultivating a 'culture of testing'**

34 467 Processes of test-implementation simultaneously enable and demand a renegotiated 'culture of testing' within  
35  
36 468 the ED setting. Intervention efforts point toward a standardising of staff practice and patient expectation – one  
37  
38 469 that would see 'testing everyone', and thus getting tested, made the norm. The test-all precedent was seen to  
39  
40 470 alleviate the sense of an implied, or felt, target:  
41  
42 471

43 472 *... and the fact that it's on the wall and it's saying that it's a, you know, 'we're asking everybody if you*  
44 473 *want to be tested' then it's kind of 'oh OK, you know, you probably asked the guy that was in before,*  
45 474 *I'm no different'... (Phil)*  
46  
47 475

48  
49 476 Helping dispel initial anxieties of *why are you testing me?*, the routinising of the test practice was seen to  
50  
51 477 improve the test experience. The test 'standard', easier to deliver and more readily received, contrasts with a  
52  
53 478 differential test that 'puts the fear of god into that one person, that we're testing you for it...' (clinic staff). Staff  
54  
55 479 participants' reflections on the intervention in practice suggest that a standardised test-approach both  
56  
57 480 facilitates greater diagnostic opportunity and helps diffuse prevailing preconceptions of those 'affected',  
58 481 within and beyond the clinic environment.  
59  
60 482

60 483 *I think we're missing out on a massive group of people by, by targeting it and I think here we're kind of*

1  
2  
3 484 *getting people from every spectrum, every walk of life and [...] there are people who are having*  
4 485 *positive results that you kind of don't, [...] it's not someone that, and this is going to sound awful but*  
5 486 *it's not someone that you expect to have had a positive test. I think there's still, even for us [clinic*  
6 487 *staff] there's still kind of like a little bit of stigma around it and you attach it to certain groups of*  
7 488 *people. (clinic staff)*

8 489  
9 490 As patients' accounts reiterated, public misconceptions relating to HIV – though 'changing' -- were still felt to  
10 491 be present and problematic.

11 492  
12 493 Yet perceptions of test value and expectation are also shaped by how legitimate patients considered their (and  
13 494 others') claims to clinic time and resources. The efficacy of the intervention – how efficient it is and who's  
14 495 going to pay – was a question often posited by patient participants: '...if the benefits of doing it cannot be  
15 496 justified by the resource cost that would be needed to do it then clearly it can't be done [...] It's a no-brainer'  
16 497 (Malcom). Patient anxieties of 'wasting time' betray a reluctance to access primary care until a specific health-  
17 498 need can be clearly evidenced. Efforts to reconfigure testing norms and expectations can thus sit in tension  
18 499 with perceptions of systemic constraints that do not encourage or support people to 'just check':

19 500  
20 501 *... It has to be like a society, society's mentality to just check, you know take care of your body and, you*  
21 502 *know, make sure everything is okay and not only when you're, you know, dying, or something is*  
22 503 *seriously wrong because many times it's too late when that happens, you know. (Lena)*

23 504  
24 505 Current testing cultures orientate around *having reason*; legitimised through an identifiable symptom or risk.  
25 506 Efforts to routinise the test-practice remain situated within, and shaped by, broader norms of service deferral;  
26 507 an *ethic of waiting* until need is established, where public responsibilities to monitor one's health sit relative to  
27 508 the cost of doing so.

28 509  
29 510 Renegotiating testing cultures meets further resistance in the limited knowledge and talk of the tested viruses.  
30 511 Although they did not infringe on participants' decisions to test in this study, illness stigma and related  
31 512 anxieties were commonly offered as a reason why 'others' may prove reluctant. Interview discussions  
32 513 orientated heavily around HIV, with hepatitis B and C both less understood and spoken about. While degrees  
33 514 of HIV talk differed in relation to cultural norms and across generations, there was consensus that  
34 515 conversations would only ever go so far. Critical boundaries were identified between talking *about* HIV and  
35 516 *having* HIV: '...people talk about it [HIV] just as a, distant thing...' (Lena). The condition was predominantly  
36 517 depicted as an abstraction, remotely experienced through news and media coverage. Rarely discussed in the  
37 518 private sphere, limits to knowledge were accounted for in not *needing* to know.

38 519  
39 520 *... to be honest, the truth is I feel like it's something that doesn't affect or concern me. I know that*  
40 521 *sounds ignorant and stupid, but I'm just being honest with you ...And I think that's how a lot of people*

1  
2  
3 522 *feel* (Ishani)

4  
5 523

6 524 Both staff and patient responses highlight the need for concurrent change in public norms, perceptions and  
7  
8 525 talk surrounding HIV and hepatitis beyond the intervention, if routine opt-out BBV testing is to be understood  
9  
10 526 and accepted, and a broader culture of testing supported.  
11  
12 527  
13 528  
14 529  
15 530

16  
17 531 **DISCUSSION**

18 532 Our findings indicate that routine opt-out BBV testing in the ED setting is viewed as an acceptable and valuable  
19  
20 533 practice by the majority of patient and staff participants. Consistent with qualitative findings exploring HIV-  
21  
22 534 testing acceptance in EDs in the US, participants' receptivity to testing pivots around the narrative that it's  
23  
24 535 better to know;<sup>[43]</sup> - a 'better' widely underscored by the perceived availability and efficacy of HIV treatment.  
25  
26 536 Knowledge of hepatitis viruses and respective treatments was notably limited. Problems of test-  
27  
28 537 implementation were primarily linked to broader systemic constraints,<sup>[38]</sup> where unrelenting pressures of the  
29  
30 538 ED working environment impeded the process of integrating the test into routine practice. Service providers  
31  
32 539 spoke of the difficulties of navigating the *change* of the intervention, rather than reservations around the  
33  
34 540 intervention itself. Yet clinic staff also anticipated that once embedded into department procedure, and in  
35  
36 541 time patients' expectations, the feasibility of the intervention would align more closely with the observed  
37  
38 542 acceptability of the test practice.  
39  
40 543

41  
42 544 **Narratives of Responsibility:** Findings suggest that the acceptability of the intervention is shaped in part by  
43  
44 545 negotiations of competing responsibilities. A dominant narrative across participant responses was the  
45  
46 546 *responsibility to know*. Responsibilities of knowing were articulated in relation to both a private well-being of  
47  
48 547 the individual, but also a public responsibility – to know your status, more specifically a positive status, to  
49  
50 548 ensure against onward transmission. Resonating with broader neoliberal discourses of citizen expectation and  
51  
52 549 biological responsibility, participant accounts would often position test-uptake as an enactment of health  
53  
54 550 citizenship – the perceived role of a patient-citizen.<sup>[50-51]</sup> Yet narratives of responsibility were at once  
55  
56 551 countered by an absence of need and the positioning of the self as not 'affected'. Patient participants' test-  
57  
58 552 histories demonstrate, for the most part, norms of passive test-engagement made active in response to an  
59  
60 553 altered sense of risk. Transitions from an assumed-negative to a potential-positive – where felt expectations to  
554  
555 know converged with an overt health need – occasioned a more proactive, albeit temporary, test-engagement.  
556  
557 Expectations of *having need* that underscore participant narratives work to ensure the legitimacy of the test-  
558  
559 claim on clinic time and resources. With patients' heightened awareness of service-rationing, a questioned  
560  
561 appropriateness pulls against the dominant script of intervention-acceptability. Responsibilities of knowing  
562  
563 thus sit in tension with perceived personal and state responsibilities to ensure that increasingly limited clinic  
564  
565 resources are efficiently deployed. This likewise speaks to a situated ethics of a test-for-all approach,<sup>[39]</sup>

1  
2  
3 560 wherein the value of the test is positioned relative to the cost of its delivery and anticipated rate of return. In  
4 561 the absence of explicit risk and subsequent need, the test-expense is less clearly supportable.  
5  
6 562  
7  
8 563 **A Productive Disruption:** The extent to which the test-practice can be made routine and move beyond the  
9 564 initial disruption of its implementation – the point at which the extra vial ceases to be an 'extra' – though  
10 565 envisioned, remains uncertain. While staff spoke of the test-practice becoming more instinctive over time, the  
11 566 'struggle' to make the intervention a routine procedure remains evident. Amidst the pressures of ED  
12 567 workflows the intervention still posits a point of disruption. Yet efforts to standardise the test-practice also  
13 568 allow for a more productive disturbance. First is the interventions' neutralising potential as test-practice and  
14 569 meaning are reconstituted within and through the particularities of the emergency clinic environment.[59] The  
15 570 'struggle' to integrate the test into department procedure amidst uncompromising clinic demands enables,  
16 571 necessitates and makes visible the 'standardisation' of test-practice; the test is rendered less of an event  
17 572 because it *has* to be. The high patient traffic, close proximity and discernible numbers of others tested makes  
18 573 the routine of the procedure more evident. Second, the tentative displacement of the test-target in a  
19 574 generalised clinic environment disrupts 'at-risk' boundaries felt to be conferred through targeted test-  
20 575 practices and engagement. The routine practice of the test points to a test-need, expectation and  
21 576 responsibility that extends beyond existing risk parameters. This suggests a potential of the spatial dynamics of  
22 577 the ED setting to challenge socially embedded risk-associations. Obscuring 'affected/unaffected' binaries  
23 578 stands to lessen the social risk of being seen to be tested. The routine of the procedure thus affords a form of  
24 579 public protection that, in turn, lends the intervention a social value beyond the quantifiable efficacy of  
25 580 intervention uptake and diagnostic case-return.

26 581  
27  
28 582 **Situated Intervention Potential:** Yet our study findings also call attention to the limits of the test-  
29 583 intervention's 'normalising' effect. The extent to which risk-associations of testing technologies *can* be  
30 584 reconfigured through generalised test-settings and procedures remains questionable. As demonstrated in our  
31 585 findings, while the non-target approach was positively received among study participants, test-uptake was  
32 586 framed by narratives of test-ambivalence. Distinctions between those who were and were not 'at risk', though  
33 587 momentarily disrupted, were then refashioned through retrospective accounts of test-engagement (or would-  
34 588 be engagement) that continued to position the self as one not affected. Such narrative devices, though  
35 589 peripheral, call attention to embedded social constraints that continue to impede patients' efforts to  
36 590 renegotiate tacit risk-identities conferred through test practices and engagement. Expectations that a  
37 591 standardisation of clinic practice could translate into a 'normalisation' of test-experience is a formidable  
38 592 aspiration, but one that faces resistance and local negotiation. As we have observed, the routinising of the test  
39 593 procedure at once shapes and is shaped by: prior knowledge and experience of the viruses to be tested; the  
40 594 dynamics of the clinic space and therapeutic pathways; perceived health responsibilities; socially embedded  
41 595 test-associations; and the anticipated reading of test-engagement by others. Our findings indicate that the  
42 596 intervention's embryonic effect is constituted through, and contingent on, the processes of its local

1  
2  
3 597 implementation. Test-meaning and value are recursively produced as altered norms of practice are variously  
4 598 encountered and negotiated within and beyond the test event.[59-60]

5 599

6 599  
7  
8 600 **Policy Implications and Study Limitations:** Our qualitative analysis offers a critical sociological contribution to  
9 601 intervention evaluation that will enrich statistical appraisal of BBV test-uptake, diagnosis rates and cost-  
10 602 effectiveness.[56] An improved understanding of participant perspectives and intervention experience, as  
11 603 supported by this study's analysis, will likely contribute to the success and efficacy of intervention scale-up  
12 604 beyond the pilot. Study findings highlight the need to attend to the local particularities of intervention  
13 605 implementation if the benefits of the test-initiative are to be fully realised. Considerations of expanded  
14 606 practice in the UK must take seriously the intensity of ED workflows and the implications of increasing  
15 607 demands on already over-stretched emergency care resources. Intervention-reach and test-uptake among  
16 608 migrant populations – as pertinent to those disproportionately affected by HIV and viral hepatitis in the UK  
17 609 [2,3,32,47] – will likely remain restricted while language barriers continue to preclude test-offer and delivery  
18 610 to this patient sub-group. Yet our findings also demonstrate the intervention's potential to extend an  
19 611 alternative route of contact with individuals at risk of falling through the gaps,[33] or positioned beyond  
20 612 targeted test strategies. Significant also is the extent to which hepatitis B and C, relative to HIV, were not only  
21 613 less discussed but, for the most part, much less understood. Limited public knowledge of these conditions calls  
22 614 to question the ethical implications of introducing an opt-out test procedure among individuals who have little  
23 615 if any understanding of what a positive result might mean.

24 616

25 617 Interpretation of our qualitative findings must also attend to a number of study limitations. First, study  
26 618 findings draw from a small, site-specific population. Second, our sample does not include patients who felt  
27 619 themselves to be potentially at risk of a positive result. As identified through explorative research of  
28 620 alternative HIV test-interventions,[44] test practices and the acceptability of intervention procedure will  
29 621 invariably take on different meanings for those negotiating a potential positive, and demands further enquiry.  
30 622 Likewise, in interviewing individuals at the point of clinic contact, the study was not able to explore the views  
31 623 and experiences of those diagnosed through the ED test procedure, and thus the onward dimensions of the  
32 624 test intervention that are integral to the intervention process. Exploration of post-test experience and its  
33 625 implications for test-acceptability and engagement is needed for a more comprehensive understanding and  
34 626 evaluation of intervention experience and value.

35 627

1  
2  
3 **628 Declarations**

4 629  
5 630  
6 631 *Acknowledgements:* The authors would like to thank all those who participated in the study for their time and  
7 632 the valuable information shared with us. We are also grateful to the ED clinic lead and staff members for their  
8 633 assistance and support during study fieldwork and recruitment. We thank the community organisation  
9 634 representatives of the Hepatitis C Trust and British Liver Trust with whom we consulted during the study  
10 635 design. We also wish to acknowledge and thank study funders for their financial support, and *NIHR HPRU in*  
11 636 *Blood Borne and Sexually Transmitted Infections Steering Committee:* Caroline Sabin (Director), Anthony  
12 637 Nardone (PHE Lead), Catherine Mercer, Gwenda Hughes, Jackie Cassell, Greta Rait, Samreen Ijaz, Tim Rhodes,  
13 638 Kholoud Porter, Sema Mandal and William Rosenberg.

14 639  
15 640 *Author's contributions:* Conceptualisation and critical direction for the study was provided by TR, SM, PG, AR,  
16 641 CO and LC. Data generation was completed by LC. Primary data analysis was carried out by LC, with input from  
17 642 PG. The original manuscript was prepared by LC. All authors reviewed and provided critical input to manuscript  
18 643 drafts, and provided final approval.

19 644  
20 645 *Funding:* The study was undertaken with funding from the National Institute for Health Research Health  
21 646 Protection Research Unit (NIHR HPRU) in Blood Borne and Sexually Transmitted Infections at UCL in  
22 647 partnership with Public Health England and in collaboration with London School of Hygiene and Tropical  
23 648 Medicine. The views expressed in this publication are those of the author(s) and not necessarily those of the  
24 649 National Institute for Health Research or Public Health England.

25 650  
26 651 *Conflict of interest:* CO has received research grants, lecture fees, travel grants and honoraria toward advisory  
27 652 boards from MSD, Gilead, Viiv and Janssen. Toward this work, CO received funding for the testing project by a  
28 653 Gilead Fellowship grant. AR receives non-restricted grant funding from Gilead. LC, PG, SM and TR declare no  
29 654 conflicts of interest in relation to this work and its submission. The paper has not been previously published  
30 655 and neither is it being considered for publication elsewhere.

31 656  
32 657 *Ethics Approval and consent to participate:* The study was granted ethical approval form the West Midlands–  
33 658 South Birmingham Research Ethics Committee (ref 16/WM/0033), and the London School of Hygiene and  
34 659 Tropical Medicine Observational Research Ethics Committee (ref 10469). All study participants provided  
35 660 informed written consent prior to the start of the study interview.

36 661  
37 662 *Availability of data and materials:* No additional data are available.  
38 663  
39 664  
40  
41  
42  
43  
44  
45  
46  
47  
48  
49  
50  
51  
52  
53  
54  
55  
56  
57  
58  
59  
60

1  
2  
3 665 **REFERENCES**  
4 666  
5 667  
6 668  
7 669  
8 670  
9 671  
10 672  
11 673  
12 674  
13 675  
14 676  
15 677  
16 678  
17 679  
18 680  
19 681  
20 682  
21 683  
22 684  
23 685  
24 686  
25 687  
26 688  
27 689  
28 690  
29 691  
30 692  
31 693  
32 694  
33 695  
34 696  
35 697  
36 698  
37 699  
38 700  
39 701  
40 702  
41 703  
42 704  
43 705  
44 706  
45 707  
46 708  
47 709  
48 710  
49 711  
50 712  
51 713  
52 714  
53 715  
54 716  
55 717  
56 718  
57 719  
58 720  
59 721  
60 722

- 1) Nardone A, Delpech V, Gill O, et al. HIV in the UK: test, test, and test again. *Lancet*, 2013;382(9906):1687–1688
- 2) Brown AE, Kirwan PD, Chau C, et al. *Towards elimination of HIV transmission, AIDS and HIV-related deaths in the UK – 2017 report*. London, Public Health England, 2017.
- 3) Harris H (editor). *Hepatitis C in the UK – 2017 Report*. London, Public Health England, 2017.
- 4) Nash SG, Furegato M, Gill ON, et al. *HIV testing in England: 2017 report*. London, Public Health England, 2017
- 5) *Political Declaration on HIV and AIDS: On the Fast Track to Accelerating the Fight against HIV and to Ending the AIDS Epidemic by 2030*. A/RES/70/266. United Nations General Assembly, June 2016
- 6) World Health Organisation, *Global Health Sector Strategy on Viral Hepatitis 2016-2021: Towards ending viral hepatitis*. Geneva, 2016
- 7) World Health Organisation, *Global Hepatitis Report 2017*. Geneva, WHO, 2017.
- 8) World Health Organisation (2017), *Statement on HIV testing services*.
- 9) May M, Gompels M, Delpech V, et al. Impact on life expectancy of HIV-1 positive individuals of CD4+ cell count and viral load response to antiretroviral therapy. *AIDS*. 2014;28:1193-1202
- 10) Rodger A, Sabin C (2016). How have guidelines on when to start antiretroviral therapy affected survival of people living with HIV infection. *Curr Opin in HIV and Aids*.2016;11(5):487-491.
- 11) INSIGHT START. Initiation of Antiretroviral Therapy in Early Asymptomatic HIV Infection. *N Eng J Med*. 2015;373(9):795-807
- 12) TEMPRANO ANRS 12136 Study Group. A trial of early antiretrovirals and isoniazid preventive therapy in Africa. *N Eng J Med*. 2015;373:808-822.
- 13) Cohen MS, McCauley M, Gamble T. HIV treatment as prevention and HPTN 052. *Curr Opin in HIV and Aids*, 2012;7(2):99-105.
- 14) Miller WC, Powers KA, Smith MK, et al. Community viral load as a measure for assessment of HIV treatment as prevention. *Lancet Infect Dis*.2013;13:459-64.
- 15) Rodger A, Cambiano V, Bruun T, et al for the PARTNER Study Group. Sexual Activity Without Condoms and Risk of HIV Transmission in Serodifferent Couples When the HIV-Positive Partner Is Using Suppressive Antiretroviral Therapy. *JAMA*. 2016;316(2):171-81. doi: 10.1001/jama.2016.5148.
- 16) World Health Organisation. *Consolidated guidelines on HIV Testing Services: 5Cs – consent, confidentiality, counselling, correct results and connection*. France; WHO, 2015.
- 17) Kiran PD, Chau C, Brown AE et al. *HIV in the UK – 2016 Report*. London Public Health England, 2016.
- 18) Costella, A., Balogaun, K., Andrews, N., Mandal, S., Harris, H. *Hepatocellular Carcinoma Deaths in England with Chronic Hepatitis B and Hepatitis C Infection*. Poster presented at Faculty of Public Health Annual Conference and Public Health Exhibition; 14-15 June 2016, Brighton Centre, Brighton.
- 19) Public Health England. *2<sup>nd</sup> Atlas of variation in risk factors and Healthcare for Liver Disease in England – Hepatitis B*. London, Public Health England, 2017.
- 20) Public Health England. *Shooting Up: Infections among people who inject drugs in the UK, 2015*. London: Public Health England, 2016.
- 21) British HIV Association (BHIVA), British HIV Association for Sexual Health and HIV, British Infection Society. *UK Guidelines for HIV testing 2008*. London, 2008.
- 22) National Institute for Health and Clinical Excellence (NICE). *Hepatitis B and C: ways to promote and offer testing to people at increased risk of infection*. Public health guidance. PH43.
- 23) Croxford S, Kitching A, Desai S et al. Mortality and causes of death in people diagnosed with HIV in the era of highly active antiretroviral therapy compared with the general population: an analysis of a national observational cohort. *Lancet Public Health*. 2016;2(1);e-35-e46.
- 24) Rayment M, Thornton A, Mandalia S, et al. HIV testing in non-traditional settings—the HINTS study: a multi-centre observational study of feasibility and acceptability. *PLoS One*. 2012;7(6):e39530.



1  
2  
3  
4  
5  
6  
7  
8  
9  
10  
11  
12  
13  
14  
15  
16  
17  
18  
19  
20  
21  
22  
23  
24  
25  
26  
27  
28  
29  
30  
31  
32  
33  
34  
35  
36  
37  
38  
39  
40  
41  
42  
43  
44  
45  
46  
47  
48  
49  
50  
51  
52  
53  
54  
55  
56  
57  
58  
59735  
736  
737  
738  
739  
740  
741  
742  
743  
744  
745  
746  
747  
748  
749  
750  
751  
752  
753  
754  
755  
756  
757  
758  
759  
760  
761  
762  
763  
764  
765  
766  
767  
768  
769  
770  
771  
772  
773  
774  
775  
776  
777  
778  
779  
780  
781  
782  
783  
784  
785  
786  
787  
788  
789  
790  
791  
792  
793  
794  
795  
796  
797  
798  
799  
800  
801  
802  
803

- 25) Burns F, Edwards SG, Woods J, *et al.* Acceptability and feasibility of universal offer of rapid point of care testing for HIV in an acute admissions unit: results of the RAPID project. *PLoS One* 2012; 7(4):e35212.
- 26) Phillips D, Barbour A, Stevenson J, *et al.* Implementation of a routine HIV testing policy in an acute medical setting in a UK general hospital: a cross-sectional study. *Sex Transm Infect.* 2014;90(3):185-7
- 27) Leber W, McMullen H, Anderson J *et al.* Promotion of rapid testing for HIV in primary care (RHIVA2): a cluster-randomised controlled trial. *Lancet HIV*, 2015;2:e229–235
- 28) Glew S, Pollard A, Hughes L, *et al.* Public attitudes towards opt-out testing for HIV in primary care: a qualitative study. *Br J Gen Pract.* 2014;64(619):E60-66
- 29) Witzel TC, Rodger AJ, Burns FM, *et al.* HIV Self-Testing among Men Who Have Sex with Men (MSM) in the UK: A Qualitative Study of Barriers and Facilitators, Intervention Preferences and Perceived Impacts. *PLoS ONE* 2016;11(9); doi.org/10.1371/journal.pone.0162713
- 30) Bath R, Ahmad K, Orkin C. Routine HIV testing within the emergency department of a major trauma centre: a pilot study. *HIV Med.* 2015. DOI: 10.1111/hiv.12216
- 31) College of Emergency Medicine. *The Way Ahead 2008-2012: Strategy and guidance for Emergency Medicine in the United Kingdom and the Republic of Ireland.* London, 2008.
- 32) Cochrane A, Collins P, Horwood J. Barriers and opportunities for hepatitis B testing and contact tracing in a UK Somali population: a qualitative study. *Eur J Public Health*, 2016;26(3);389–395
- 33) Harris M, Ward E, Gore C. Finding the undiagnosed: A qualitative exploration of hepatitis C diagnosis delay in the United Kingdom. *J Viral Hepat.* 2016;23(6):479-86
- 34) Datta S, Horwood J, Hickman M, *et al.* Case-finding for hepatitis C in primary care: a mixed-methods service evaluation. *Br J Gen Pract.* 2014;64(619):e67-e74
- 35) Branson BM, Handsfield HH, Lampe MA, *et al.* Revised recommendations for HIV testing of adults, adolescents, and pregnant women in health-care settings. *MMWR Recomm Rep*; 2006.55(RR-14):1-17
- 36) Schnall R, Clark S, Olender S, *et al.* Providers' Perceptions of the Factors Influencing the Implementation of the New York State Mandatory HIV Testing Law in Two Urban Academic Emergency Departments. *Acad Emerg Med.* 2013.20(3);279-286
- 37) Torres G, Heffelfinger J, Pollack HA, *et al.* HIV Screening Programs in US Emergency Departments: A Cross-Site Comparison of Structure, Process, and Outcomes. *Ann Emerg Med.* 2011;58(1):s105-s113.
- 38) Thornton A, Rayment M, Elam G, *et al.* Exploring staff attitudes to routine HIV testing in non-traditional settings: a qualitative study in four healthcare facilities. *Sex Transm Infect*, 2012;88: 601-606
- 39) Waxman M, Popick R., Merchant R, *et al.* Ethical, Financial, and Legal Considerations to Implementing Emergency Department HIV Screening: A Report From the 2007 Conference of the National Emergency Department HIV Testing Consortium. *Annals of Emergency Medicine*, 2011;58(1):S34-s43
- 40) Chen JC, Goets M B, Feld J E, *et al.* A provider participatory implementation model for HIV testing in an ED, *American Journal on Emergency Medicine*, 2011;29:418-426.
- 41) Cowan E, Leider J, Velastegui L, *et al.* A Qualitative Assessment of Emergency Department Patients' Knowledge, Beliefs, Attitudes, and Acceptance Toward Revised HIV Testing Strategies. *Acad Emerg Med.* 2013;20(3):287-294
- 42) Christopoulos K, Massey A, Lopez A, *et al.* Patient Perspectives on the Experience of Being Newly Diagnosed with HIV in the Emergency Department/Urgent Care Clinic of a Public Hospital. *PLoS One*, 2013;8(8): doi.org/10.1371/journal.pone.0074199
- 43) Christopoulos KA, Weiser S, Koester K, *et al.* Understanding patient acceptance and refusal of HIV testing in the emergency department, *BMC Public Health*, 2012;12(3). doi.org/10.1186/1471-2458-12-3
- 44) Witzel TC, Weatherburn P, Rodger A, *et al.* Risk, reassurance and routine: a qualitative study of narrative understandings of the potential for HIV self-testing among men who have sex with men in England. *BMC Public Health.* 2017;17(491);DOI 10.1186/s12889-017-4370-0
- 45) Flowers P, Knussen C, Li J, McDaid L. Has testing been normalized? An analysis of changes in barriers to HIV testing among men who have sex with men between 2000 and 2010 in Scotland UK. *HIV Med.* 2013;14(2):92–8.
- 46) Lupton D, *The imperative of health: public health and the regulated body.* London: Sage 1995.

- 1  
2  
3 804  
4 805  
5 806  
6 807  
7 808  
8 809  
9 810  
10 811  
11 812  
12 813  
13 814  
14 815  
15 816  
16 817  
17 818  
18 819  
19 820  
20 821  
21 822  
22 823  
23 824  
24 825  
25 826  
26 827  
27 828  
28 829  
29 830  
30 831  
31 832  
32 833  
33 834  
34 835  
35 836  
36 837  
37 838  
38 839  
39 840  
40 841  
41 842  
42 843  
43 844  
44 845  
45 846  
46 847  
47 848  
48 849  
49 850  
50  
51  
52  
53  
54  
55  
56  
57  
58  
59  
60
- 47) Sweeney L, Owiti J, Beharry A, et al. Informing the design of a national screening and treatment programme for chronic viral hepatitis in primary care: qualitative study of at-risk immigrant communities and healthcare professionals, *BMC Health Serv Res* 2015; 15:97; doi.org/10.1186/s12913-015-0746-y
- 48) D'Almeida KW, Kierzek G, Truchis P, et al. Modest Public Health Impact of Nontargeted Human Immunodeficiency Virus Screening in 29 Emergency Departments, *Archives for International Medicine*, 2011:535: doi: 10.1001/archinternmed.2011.535
- 49) Waxman M J, Merchant R C, Celada M T, et al. Perspectives on the ethical concerns and justifications of the 2006 Centers for Disease Control and Prevention HIV testing: HIV screening policy changes *BMC Med Ethics*, 2013;14: 46; doi:10.1186/1472-6939-14-46
- 50) Petersen A, Davis M, Fraser S, et al. Healthy living and citizenship: an overview, *Crit Public Health*, 2010;20(4):391-400, DOI: 10.1080/09581596.2010.518379
- 51) Rose, N. and Novas, C., 2005. Biological citizenship. In: A. Ong and S.J. Collier, eds. *Global assemblages: technology, politics, and ethics as anthropological problems*. Malden, MA and Oxford: Blackwell Publishing.
- 52) Petryna, A., 2002. *Life exposed: biological citizens after Chernobyl*. Princeton, NJ and Oxford: Princeton University Press.
- 53) Boydell N, Buston K, McDaid L. Patterns of HIV testing practices among young gay and bisexual men living in Scotland: a qualitative study, *BMC Public Health*, 2017;17:660; doi:10.1186/s12889-017-4653-5
- 54) Flowers P, Estcourt C, Sonnenberg P, et al. HIV testing intervention development among men who have sex with men in the developed world, *Sex Health*, 2017;18:80-88
- 55) Flowers P. HIV transitions: consequences for self in an era of medicalisation. In: Davis M, Squire C, eds. *HIV Treatment and Prevention Technologies in International Perspective*. Basingstoke: Palgrave Macmillan, 2010; 109–125.
- 56) Orkin C, Flanagan S, Wallis E, et al. Incorporating HIV/hepatitis B virus/hepatitis C virus combined testing into routine blood tests in nine UK Emergency Departments: the “Going Viral”. *HIV Med*, 2016;17:222-230
- 57) Strauss AL, Corbin JM. *Grounded theory procedures and techniques*. Newbury Park, CA: Sage Publications, 1990.
- 58) Green J and Thorogood T. (2014). *Qualitative Methods for Health Research*. Third edition (2014), Sage Publications; London
- 59) Rhodes T, Closson EF, Papparini S, et al. Towards “evidence-making intervention” approaches in the social science of implementation science: The making of methadone in East Africa. *Int J Drug Policy* 2016;30:17-26
- 60) Mol, A. (2002). *The body multiple*. Durham, NC: Duke University Press.

**CONSOLIDATED CRITERIA FOR REPORTING QUALITATIVE STUDIES (COREQ): 32-ITEM CHECKLIST FOR INTERVIEWS AND FOCUS GROUPS**

| NUMBER                                         | ITEM                                     | GUIDE/QUESTION/DESCRIPTION                                                                                                                       | RESPONSE                                                                                        | PAGE |
|------------------------------------------------|------------------------------------------|--------------------------------------------------------------------------------------------------------------------------------------------------|-------------------------------------------------------------------------------------------------|------|
| <b>Domain 1: Research team and reflexivity</b> |                                          |                                                                                                                                                  |                                                                                                 |      |
| Personal Characteristics                       |                                          |                                                                                                                                                  |                                                                                                 |      |
| 1                                              | Interviewer                              | Which author/s conducted the interview or focus group?                                                                                           | Lucy Cullen                                                                                     | 7    |
| 2                                              | Credentials                              | What were the researcher's credentials? <i>E.g. PhD, MD</i>                                                                                      | MSc, PhD Candidate                                                                              |      |
| 3                                              | Occupation                               | What was their occupation at the time of the study?                                                                                              | Social Science Researcher                                                                       |      |
| 4                                              | Gender                                   | Was the researcher male or female?                                                                                                               | Female                                                                                          |      |
| 5                                              | Experience and training                  | What experience or training did the researcher have?                                                                                             | Qualitative Research Methods Training; 3+ years qualitative health research/analysis experience |      |
| Relationship with participants                 |                                          |                                                                                                                                                  |                                                                                                 |      |
| 6                                              | Relationship established                 | Was a relationship established prior to study commencement?                                                                                      | No                                                                                              | 7    |
| 7                                              | Participant knowledge of the interviewer | What did the participants know about the researcher? <i>e.g. personal goals, reasons for doing the research</i>                                  | As informed during consent process                                                              | 7    |
| 8                                              | Interviewer characteristics              | What characteristics were reported about the interviewer/facilitator? <i>e.g. Bias, assumptions, reasons and interests in the research topic</i> | As informed during consent process                                                              | 7    |
| <b>Domain 2: study design</b>                  |                                          |                                                                                                                                                  |                                                                                                 |      |
| Theoretical framework                          |                                          |                                                                                                                                                  |                                                                                                 |      |
| 9                                              | Methodological orientation and           | What methodological orientation was stated to                                                                                                    | Grounded approach to qualitative                                                                | 7    |

|    |                              |                                                                                                                   |                                                         |     |
|----|------------------------------|-------------------------------------------------------------------------------------------------------------------|---------------------------------------------------------|-----|
|    | Theory                       | underpin the study? <i>e.g. grounded theory, discourse analysis, ethnography, phenomenology, content analysis</i> | thematic analysis                                       |     |
|    | Participant selection        |                                                                                                                   |                                                         |     |
| 10 | Sampling                     | How were participants selected? <i>e.g. purposive, convenience, consecutive, snowball</i>                         | purposive                                               | 7   |
| 11 | Method of approach           | How were participants approached? <i>e.g. face-to-face, telephone, mail, email</i>                                | Face-to-face                                            | 7   |
| 12 | Sample size                  | How many participants were in the study?                                                                          | 22                                                      | 6   |
| 13 | Non-participation            | How many people refused to participate or dropped out? Reasons?                                                   | None dropped out                                        |     |
|    | Setting                      |                                                                                                                   |                                                         |     |
| 14 | Setting of data collection   | Where was the data collected? <i>e.g. home, clinic, workplace</i>                                                 | clinic                                                  | 7   |
| 15 | Presence of non-participants | Was anyone else present besides the participants and researchers?                                                 | no                                                      | 7   |
| 16 | Description of sample        | What are the important characteristics of the sample? <i>e.g. demographic data, date</i>                          | Sex; age; ethnicity; test response                      | 7/9 |
|    | Data collection              |                                                                                                                   |                                                         |     |
| 17 | Interview guide              | Were questions, prompts, guides provided by the authors? Was it pilot tested?                                     | Guided areas of discussion but not prescribed questions | 7   |
| 18 | Repeat Interviews            | Were repeat interviews carried out? If yes, how many?                                                             | No                                                      |     |
| 19 | Audio/visual recording       | Did the research use audio or visual recording to collect the data?                                               | Yes                                                     | 7   |
| 20 | Field notes                  | Were field notes made during and/or after the interview or focus group?                                           | Yes                                                     |     |
| 21 | Duration                     | What was the duration of the interviews or focus group?                                                           | 20-50 minutes (depending on availability)               | 7   |

|                                        |                                |                                                                                                                                          |                                                                                                   |       |
|----------------------------------------|--------------------------------|------------------------------------------------------------------------------------------------------------------------------------------|---------------------------------------------------------------------------------------------------|-------|
| 22                                     | Data saturation                | Was data saturation discussed?                                                                                                           | No (limits to sample size discussed)                                                              |       |
| 23                                     | Transcripts returned           | Were transcripts returned to participants for comment and/or correction?                                                                 | No                                                                                                |       |
| <b>Domain 3: analysis and findings</b> |                                |                                                                                                                                          |                                                                                                   |       |
| Data analysis                          |                                |                                                                                                                                          |                                                                                                   |       |
| 24                                     | Number of data coders          | How many data coders coded the data?                                                                                                     | Coding developed concurrently with data generation; reviewed and developed with second researcher |       |
| 25                                     | Description of the coding tree | Did authors provide a description of the coding tree?                                                                                    | No                                                                                                |       |
| 26                                     | Derivation of themes           | Were themes identified in advance or derived from the data?                                                                              | Primarily derived from data though some a priori areas explored                                   | 7     |
| 27                                     | Software                       | What software, if applicable, was used to manage the data?                                                                               | None                                                                                              |       |
| 28                                     | Participant checking           | Did participants provide feedback on the findings?                                                                                       | No                                                                                                |       |
| Reporting                              |                                |                                                                                                                                          |                                                                                                   |       |
| 29                                     | Questions presented            | Were participant quotations presented to illustrate the themes / findings? Was each quotation identified? e.g. <i>participant number</i> | Yes; Yes                                                                                          | 10-15 |
| 30                                     | Data and findings consistent   | Was there consistency between the data presented and the findings?                                                                       | Yes                                                                                               | 10-15 |
| 31                                     | Clarity of major themes        | Were major themes clearly presented in the findings?                                                                                     | Yes                                                                                               | 10-15 |
| 32                                     | Clarity of minor themes        | Is there a description of diverse cases or discussion of minor themes?                                                                   | Yes                                                                                               | 10-15 |
